# Supplementary material for: Structure of the Bacterial Ribosome at 2 Å Resolution
Source: bioRxiv preprint, doi:10.1101/2020.06.26.174334, version 1 (2020-06-26)
Supplement: Supplementary Table 1 [file 174334_file02.xlsx]

## Sheet: phage
sequence	S21_origin	virus_host	start codon	rbs_motif	rbs_spacer	rbs region
FFC_092018_0_1um_scaffold_17_207|FFC_092018_0_1um_partial_phage_31_10|FFC_092018_0_1um	bacteroidetes		ATG	GGA/GAG/AGG	5-10bp	AAACGCATTAGGTTAATATATG
BC_09192017_0_5m_scaffold_318_57|BC_09192017_0_5m_Phage_30_6|BC_09192017_0_5m	bacteroidetes		ATG	None	None	AATATTAAAAATTTTAATTATG
BC_09192017_0_5m_scaffold_86_195|BC_09192017_0_5m_Phage_29_7|BC_09192017_0_5m	bacteroidetes		ATG	None	None	ACATTGATATATATTGTATATG
LacPavin_0419_WC53_scaffold_21453_84|LacPavin_0419_WC53_Phage_33_16|LacPavin_0419_WC53	bacteroidetes		ATG	None	None	TTGTAGATATTTCTAATATATG
LacPavin_0419_WC53_scaffold_5167_189|LacPavin_0419_WC53_Phage_28_13|LacPavin_0419_WC53	bacteroidetes		ATG	None	None	AATAGACTATATGTAATATATG
RHP_09252018_0_1um_scaffold_92_207|RHP_09252018_0_1um_Potentially_Complete_Phage_34_17|RHP_09252018_0_1um	bacteroidetes		ATG	TAAA	8bp	ATTTAATTAAACTAGTTATATG
LacPavin_0818_WC45_scaffold_4_curated_closed_complete_startadj_prodigalsingle_723|LP_PHAGE_COMPLETE_CIRCUCL_32_18|LacPavin_0818_WC45	bacteroidetes	Bacteroidetes (HPAE)	ATG	AGGAG	5-10bp	TAAAAACAAAGGAGGATAAATG
Ig8144_scaffold_2_curated_closed_complete_startadj_prodigalsingle_102|BJP_PHAGE_COMPLETE_CIRCUCLST_29_18|09V250M02_2016_bjp_ig8144	bacteroidetes	Bacteroidetes (HPAE)	ATG	GGA/GAG/AGG	5-10bp	AAAATTAAAAGGGTATTAGATG
LacPavin_0818_WC45_scaffold_160996_curated_closed_complete_prodigalsingle_485|LP_PHAGE_COMPLETE_CIRCUCL_31_18|LacPavin_0818_WC45	bacteroidetes	Bacteroidetes (HPAE)	ATG	GGA/GAG/AGG	5-10bp	TTAAAAGAGTATTAGACTAATG
Mad1_20_16_scaffold_0_curated_closed_complete_startadj_prodigalsingle_699|MAD1_PHAGE_COMPLETE_CIRCUCLST_26_25|Mad1_20_16	bacteroidetes	Bacteroidetes (HPAE)	ATG	None	None	ATAAAAAATAAATACAATCATG
PH2015_20_scaffold_1_prodigalsingle_157|ERM_PHAGE_CIR_34_117|PH2015_20	bacteroidetes	Bacteroidetes (HPAE)	ATG	TAA	4bp	ATGCAAAGGAATTAATTAAATG
BML_08042016_6_5m_scaffold_2_prodigalsingle_41|BML_PHAGE_29_17|BML_08042016_6_5m	bacteroidetes	Bacteroidetes (HPAE)	ATG	None	None	GGGTTAAAAAATAAAAAATATG
LacPavin_0818_WC45_scaffold_65992_prodigalsingle_84|LP_PHAGE_30_17|LacPavin_0818_WC45	bacteroidetes	Bacteroidetes (HPAE)	ATG	None	None	TATACAAACATGAAAATATATG
TCC_s4_2_scaffold_10805_7|spring2018soilphage_unknown_49_7|spring2018soilphage	CPR		ATG	AATAA	5bp	ATAGTGTACAATAAGTGGAATG
TCC_s4_2_scaffold_280_13|TCC_s4_2_phage_280|spring2018soilphage			GTG	AGGAG	5-10bp	AGGCCCAAAAGGAGCAGGCGTG
RBG_13_scaffold_546_31|RBG_13_phage|RBG_13			ATG	GGA/GAG/AGG	5-10bp	AAAGGTGGCGAGAAAACTAATG
PLM4_65_b1_redo_sep16_scaffold_626_112|PLM4_65cm_b1_redo_sep2016_Phage_29_13|PLM4_65cm_b1_redo_sep2016			ATG	GGAG/GAGG	5-10bp	AAAAATCGAGAGGGTGGTGATG
TCC_s4_2_scaffold_303_4|TCC_s4_2_phage_303|spring2018soilphage			ATG	None	None	AACAAAAGATAAGTGAAACATG
PPR_Contig_984988_prodigalsingle_57|PPRW_PHAGE_36_0|wrighton_potential_big_phage		Proteobacteria (HPAE)	ATG	AGGA	5-10bp	AACAAAAGGATTTTTAACTATG
PHAGEA6js4906273_S30_scaffold_5_curated_closed_complete_prodigalsingle_223|A6_PHAGE_COMPLETE_CIRCUCL_34_1|js4906273_S30		Firmicutes (HPAE)	ATG	AGxAGG/AGGxGG	11-12bp	AAGGTGGTGACATTTAAACATG
Filtrate_w_scaffold_6_prodigalsingle_19|MOOSEW_PHAGE_30_0|wrighton_potential_big_phage		Firmicutes (HPAE)	GTG	None	None	GTGATTTATTTTGGCTACAGTG
rifoxyc1_full_scaffold_27_prodigalsingle_189|RIF_PHAGE_CIR_29_18|RIFOXYC1_FULL		Proteobacteria (HPAE)	ATG	GGA/GAG/AGG	11-12bp	TCAAGGGATCAAATAATCTATG
rifcsplowo2_12_scaffold_23_prodigalsingle_116|RIF_PHAGE_CIR_29_13|RIFCSPLOWO2_12_FULL		CPR (HPAE)	ATG	None	None	AAAGAAATGAAAGAAAAATATG
amazon_plume_scaffold_4_prodigalsingle_208|AP_PHAGE_CIR_35_225|amazonplume		Proteobacteria (HPAE)	ATG	GGAG/GAGG	5-10bp	AAGGAAAGAAGAGGAACAAATG
BML_coassembly_scaffold_2823_52|BML_coassembly_Phage_39_9|BML_coassembly			ATG	AATAA	13bp	CAATAATATAGGTGTAATAATG
DD1S77SP2S22A_scaffold_17_83|DD1S77SP2S22A_Phage_37_17|DD1S77SP2S22A			ATG	AATAA	15bp	ATAACAACCACAATTAAAAATG
BML_08182015_8_5m_scaffold_3_221|BML_08182015_8_5m_Potentially_Complete_Phage_35_16|BML_08182015_8_5m	putative betaprobacteria		GTG	GGA/GAG/AGG	5-10bp	GACGATAGAGAGTTTTTAGGTG
ALT_082018_0_1um_scaffold_29_276|ALT_082018_0_1um_Huge_Phage_41_11|ALT_082018_0_1um	putative betaprobacteria		ATG	None	None	TTAATATTTGACAAAGAGAATG
ALT_09252017_20_scaffold_265_85|ALT_09252017_20_Phage_42_25|ALT_09252017_20	putative betaprobacteria		ATG	None	None	GAGAAAGTATCAAACTATCATG
BML_08182015_8_5m_scaffold_113_165|BML_08182015_8_5m_Phage_51_10|BML_08182015_8_5m	putative betaprobacteria		GTG	None	None	GAAATTCACAGGAAGATCAGTG
ALT_07252016_14_scaffold_180_55|ALT_07252016_14_Phage_42_4|ALT_07252016_14	putative betaprobacteria		ATG	None	None	CGGTTTAAGAAAGAACATAATG
BML_coassembly_scaffold_214_108|BML_coassembly_Incompleted_Jumbo_Phage_48_21|BML_coassembly	putative betaprobacteria	Proteobacteria (HPAE)	ATG	TAA	13bp	ACTTAATGGCAGATCAGTGATG
BML_coassembly_scaffold_3042_48|BML_coassembly_Phage_38_8|BML_coassembly	putative betaprobacteria		ATG	TAA	4bp	AGAAAAGGAAATTAAATAAATG
BML_08042016_6_5m_scaffold_14_225|BML_08042016_6_5m_Phage_48_9|BML_08042016_6_5m	putative betaprobacteria	Proteobacteria (HPAE)	TTG	TATAA	4bp	CCACAAGCGATATAAGGAGTTG
CG_201501t_scaffold_2_prodigalsingle_278|CG_PHAGE_37_32|CG_201501t		Proteobacteria (HPAE)	ATG	GGA/GAG/AGG	5-10bp	ATATATTTTTAGAGACATTATG
ALT_09252017_20_scaffold_16_prodigalsingle_125|ALT_PHAGE_39_18|ALT_09252017_20	putative betaprobacteria	Proteobacteria (HPAE)	ATG	None	None	ATGATTTTTGAAGAGAAAAATG
BML_coassembly_scaffold_13_prodigalsingle_442|BML_PHAGE_CIR_41_12|BML_coassembly	putative betaprobacteria	Proteobacteria (HPAE)	ATG	None	None	GACGAAGAGGACGACACAGATG
ALT_09252017_20_scaffold_206_prodigalsingle_112|ALT_PHAGE_39_22|ALT_09252017_20	putative betaprobacteria	Proteobacteria (HPAE)	ATG	None	None	GAAGAAGACGAGGATACTGATG
BML_08042016_1_5m_scaffold_0_curated_closed_complete_prodigalsingle_362|BML_PHAGE_COMPLETE_CIRCUCL_47_17|BML_08042016_1_5m	putative betaprobacteria	Proteobacteria (HPAE)	TTG	GGAGG	5-10bp	AACTCGGAGGAAAGATAGTTTG
BML_08042016_1_5m_scaffold_1_curated_closed_gap_prodigalsingle_167|BML_PHAGE_CIRCUGA_51_12|BML_08042016_1_5m	putative betaprobacteria	Proteobacteria (HPAE)	GTG	None	None	GAAATTCACCGGTAGATCAGTG
BML_08182015_6_5m_scaffold_1_prodigalsingle_104|BML_PHAGE_CIR_40_15_A|BML_08182015_6_5m	putative betaprobacteria	Proteobacteria (HPAE)	ATG	TAA	12bp	AATTTAAATAAATAATCTTATG
BML_08182015_1_5m_scaffold_19_prodigalsingle_358|BML_PHAGE_CIR_42_5|BML_08182015_1_5m	putative betaprobacteria	Proteobacteria (HPAE)	GTG	AGGA	5-10bp	CACTCGCACAGGAAAATAAGTG
PH2017_36_ELK_O_B_scaffold_2_prodigalsingle_415|ERM_PHAGE_CIR_43_54|PH2017_36_ELK_O_B_filtered	putative betaprobacteria	Proteobacteria (HPAE)	ATG	None	None	AGTTTAAGAAAGAATACGGATG
JGI24723J26617_10000007_prodigalsingle_518|OS_PHAGE_40_40|JGI_Cruoil_06		Proteobacteria (HPAE)	ATG	GGA/GAG/AGG	5-10bp	CATTAGAAAAGGAAGATACATG
SRVP_46_scaffold_141_2630357_prodigalsingle_471|SRVP_PHAGE_40_16|SRVP_46cm_Biohub_180515		Proteobacteria (HPAE)	ATG	GGA/GAG/AGG	3-4bp	TTTTTGAGCGTCGAGTGTGATG
SRR1747028_scaffold_40_62|F06_Phage_or_prophage_38_44|F06	firmicutes		ATG	AGGAGG	5-10bp	GGGCAAAGGAGGGTTGAATATG
SRR1747018_scaffold_184_82|M01_Phage_38_31|M01	firmicutes		ATG	GGAGG	5-10bp	ATATAGGGAGGATCAAATTATG
L1_007_122G1_scaffold_2_370|L1_007_122G1_Enterococcus	firmicutes		ATG	GGAGG	5-10bp	CTCGGAGGGAGGGAATAACATG
gwc1_scaffold_8_prodigalsingle_157|GWC1_PHAGE_CIR_34_18|GWC1		CPR (HPAE)	ATG	GGA/GAG/AGG	5-10bp	ATAAAATAAAGGTGAAATAATG
pig_ID_1901_F52_scaffold_0_115|pig_ID_1901_F52_36_22|pig_ID_1901_F52phagelike	spirochaetes		ATG	GGAG/GAGG	5-10bp	TATCCAAAAGAGGTGAATAATG
pig_ID_2419_F67_scaffold_44_curated_prodigalsingle_72|PIG_PHAGE_CU_31_108|pig_ID_2419_F67	spirochaetes	Firmicutes (HPAE)	ATG	AGGAG	5-10bp	AGGAAGGAGGTGATAAATAATG
BC_09192017_0_5m_scaffold_1_155|BC_09192017_0_5m_Phage_38_14|BC_09192017_0_5m			ATG	AATAA	15bp	ATAAGTTATGAATGATCAAATG
ALT_082018_0_2um_scaffold_33_304|ALT_082018_0_2um_Artifact_Phage_Scaff|ALT_082018_0_2um			ATG	AGxAG	5-10bp	ACAGAAAAGAAGACGACGTATG
baboon_AMB_002_scaffold_13205_105|baboon_AMB_002_Potentially_Complete_Phage_37_196|baboon_AMB_002			GTG	GGAG/GAGG	5-10bp	ATAATGGGGAGGTGAGCTCGTG
JSantini_GMIN_scaffold_34_142|JSantini_GMIN_Biofilm_Phage_38_21|JSantini_GMIN_Biofilm			ATG	None	None	AAAGAGAAAGAAGAAGAAAATG
ALT_072018_0_1um_scaffold_26_136|ALT_072018_0_1um_potentially_complete_phage_38_131|ALT_072018_0_1um			ATG	TAA	3bp	TAACAAGATAAGATAATTAATG
SRR1747055_scaffold_2_prodigalsingle_338|F24_PHAGE_27_21|F24			ATG	None	None	GGTTTAATTAAAAAGTAAAATG
gwd1_scaffold_1_prodigalsingle_111|GWD1_PHAGE_CIR_38_79|GWD1		Proteobacteria (HPAE)	ATG	AGGAG	5-10bp	ATAGGAGGAGTAAAAAGATATG
LacPavin_0818_WC50_scaffold_3810_prodigalsingle_226|LP_PHAGE_41_26|LacPavin_0818_WC50	putative betaprobacteria	Proteobacteria (HPAE)	ATG	None	None	AATAACCTAATAATTAGATATG
Salt_Pond_R2_restored_H2O_MG_scaffold_2_prodigalsingle_19|SP_PHAGE_46_14|JGI_Salt_Pond_R2_restored_H2O_MG			ATG	GGA/GAG/AGG	5-10bp	TTACTCAAGGGAACACAGGATG
Salt_Pond_R1_B_D2_MG_scaffold_4_prodigalsingle_431|SP_PHAGE_44_14_B|JGI_Salt_Pond_R1_B_D2_MG			ATG	AGGA	5-10bp	ATTCTAAAAGGAAACAAGGATG
Salt_Pond_R2_restored_H2O_MG_scaffold_1_prodigalsingle_6|SP_PHAGE_CIR_38_20|JGI_Salt_Pond_R2_restored_H2O_MG			TTG	TAAA	5bp	ATGGAAGGAGTAAATCATTTTG
PH2015_18_scaffold_2_prodigalsingle_121|ERM_PHAGE_CIR_39_151|PH2015_18			ATG	None	None	GCCCCCAGCGCCGATCCCCATG
k141_307134_prodigalsingle_130|ZODLETONE_PHAGE_CIR_29_75|Zodletone_Water_assembly2018			ATG	AGGAG	5-10bp	AAAACAAACAGGAGAAAAAATG
S16_GE16_scaffold_10741_396|E_GD20172_urea3_S16_GE16_Biohub_170515_Phagelike_60_8|E_GD20172_urea3_S16_GE16_Biohub_180515			ATG	GGAG/GAGG	5-10bp	ACCCTTCTGGAGAGCAAGCATG
SRVP_02_scaffold_141_4953755_prodigalsingle_96|SRVP_PHAGE_43_18|SRVP_02cm			ATG	None	None	AAGGGTTAATCGGTAATTAATG
SRVP_46_scaffold_141_4176636_prodigalsingle_218|SRVP_PHAGE_33_10|SRVP_46cm_Biohub_180515			ATG	None	None	AACGGGTTAGTGAATAATTATG
SRVP_02_scaffold_141_5653593_49|SRVP_02cm_Phage_39_16|SRVP_02cm			ATG	TAAA	15bp	TAAAACGGGTTTTTCAGAAATG
SRVP_46_scaffold_141_3454697_75|SRVP_46cm_Biohub_180515_Phagelike_35_11|SRVP_46cm_Biohub_180515			ATG	AGxAG	5-10bp	AAATAGGTTAGTAGATAATATG
ERMLT366_2_scaffold_10_51|ERMLT366_2_Phagelike_33_7|ERMLT366_2			ATG	None	None	TAAAACGGGTTATTGATCAATG
S16_GE16_scaffold_55267_prodigalsingle_523|GD_PHAGE_CIR_35_878|E_GD20172_urea3_S16_GE16_Biohub_180515			ATG	GGA/GAG/AGG	5-10bp	TTAAAACAGGTATTTGATTATG
CG_201501t_scaffold_1_prodigalsingle_309|CG_PHAGE_34_22|CG_201501t			ATG	None	None	AGTAGGTTAGTTAGTAGAAATG
S20_GE20_scaffold_13766_prodigalsingle_207|GD_PHAGE_36_14|E_GD20172_strous5_S20_GE20_Biohub_180515			ATG	AGGA/GGAG/GAGG	11-12bp	CGAAGGAGTCATTTTACACATG
RifSed_csp2_10ft_3_scaffold_6_prodigalsingle_258|RIF_PHAGE_35_13|RifSed_csp2_10ft_3			ATG	GGA/GAG/AGG	5-10bp	CATATTGGGATTGAATGAAATG
S2_018_000_R2_scaffold_9_prodigalsingle_310|R2_PHAGE_49_14|S2_018_000_R2			GTG	AGGAG	5-10bp	CTAATAAGGAGATCCCATCGTG
S2_009_000_R2_scaffold_4_prodigalsingle_289|R2_PHAGE_CIR_46_32|S2_009_000_R2			ATG	GGAG/GAGG	5-10bp	TAACAAAATGGAGAAAATAATG
Salt_Pond_R1_B_H2O_MG_scaffold_1_prodigalsingle_291|SP_PHAGE_CIR_37_21|JGI_Salt_Pond_R1_B_H2O_MG			TTG	GGA/GAG/AGG	5-10bp	AACTCAAAGGTATTGACAATTG

## Sheet: Beta_Gammaproteo_rbs_motif
accession	start codon	rbs_motif	rbs_spacer	rbs region
WP_011870001.1|GCF_000026125.1|Herminiimonas_arsenicoxydans|Betaproteobacteria|LPKKLY	ATG	None	None	AACATTGGTTTACCTTTACATG
WP_004190342.1|GCF_000152305.1|Burkholderia_mallei_ATCC_10399|Betaproteobacteria|LPKKLY	ATG	None	None	TTTTTTTACGTGACGGGTCATG
WP_007833691.1|GCF_000179015.2|Alicycliphilus_denitrificans_BC|Betaproteobacteria|LPKKLY	ATG	None	None	ATTTGGAACACATTAGCTAATG
WP_007833691.1|GCF_000193225.1|Verminephrobacter_aporrectodeae_subsp._tuberculatae_At4|Betaproteobacteria|LPKKLY	ATG	GGA/GAG/AGG	5-10bp	GGCATATTTTGGAAAGCCAATG
WP_008811706.1|GCF_000205025.1|Parasutterella_excrementihominis_YIT_11859|Betaproteobacteria|LPKKLY	ATG	GGA/GAG/AGG	5-10bp	TATTTAGTTTAGGTGCTCGATG
WP_006296472.1|GCF_000211835.1|Hylemonella_gracilis_ATCC_19624|Betaproteobacteria|LPKKLY	ATG	GGA/GAG/AGG	5-10bp	CACATTTCGGAACGATTGAATG
WP_006682075.1|GCF_000227585.1|Candidatus_Glomeribacter_gigasporarum_BEG34|Betaproteobacteria|LPKKLY	ATG	None	None	TCTCCATTTTTTCTTGCTCATG
WP_005431181.1|GCF_000250875.1|Sutterella_parvirubra_YIT_11816|Betaproteobacteria|LPKKLY	ATG	GGA/GAG/AGG	5-10bp	CACAATTCCAGGTGTTTTAATG
WP_005665410.1|GCF_000256565.1|Herbaspirillum_lusitanum_P6-12|Betaproteobacteria|LPKKLY	ATG	None	None	CTCTTTGGTTTGAATCTACATG
WP_007833691.1|GCF_000262525.1|Leptothrix_ochracea_L12|Betaproteobacteria|LPKKLY	ATG	AGGA/GGAG/GAGG	11-12bp	CTGAAGGATTTTTTCGTTCATG
WP_007833691.1|GCF_000282995.1|Melaminivora_alkalimesophila|Betaproteobacteria|LPKKLY	ATG	GGA/GAG/AGG	11-12bp	CCTTGGAAACCACTAGCTGATG
WP_017760239.1|GCF_000333675.2|Pseudacidovorax_intermedius_NH-1|Betaproteobacteria|LPKKLY	ATG	None	None	TCAACACCTCTTTGAATCAATG
WP_018715221.1|GCF_000374625.1|Brachymonas_chironomi_DSM_19884|Betaproteobacteria|LPKKLY	ATG	None	None	CAACTGAATCCATTAGCTAATG
WP_009857718.1|GCF_000420125.1|Rubrivivax_benzoatilyticus_JA2_=_ATCC_BAA-35|Betaproteobacteria|LPKKLY	ATG	None	None	ACACGGGATCCCTGCTTACATG
WP_005665410.1|GCF_000425385.1|Pseudoduganella_violaceinigra_DSM_15887|Betaproteobacteria|LPKKLY	ATG	GGA/GAG/AGG	5-10bp	CCACTGGGAACCGCCGTGAATG
WP_022776694.1|GCF_000477435.1|Candidatus_Symbiobacter_mobilis_CR|Betaproteobacteria|LPKKLY	ATG	None	None	TGTATGTTCTCGGGCGTCCATG
WP_028312593.1|GCF_000482785.1|Derxia_gummosa_DSM_723|Betaproteobacteria|LPKKLY	ATG	None	None	TTGGAACAAGCCACGACACATG
WP_007833691.1|GCF_000518645.1|Curvibacter_gracilis_ATCC_BAA-807|Betaproteobacteria|LPKKLY	ATG	None	None	TCGCAGGCTTTGCTGGCAAATG
WP_013434742.1|GCF_000519185.1|Paraburkholderia_nodosa_DSM_21604|Betaproteobacteria|LPKKLY	ATG	None	None	CCCGATCCGTTATTGGAAAATG
WP_003052999.1|GCF_000710165.1|Delftia_tsuruhatensis|Betaproteobacteria|LPKKLY	ATG	GGA/GAG/AGG	5-10bp	ATATCTGGAAATCTAGCTAATG
WP_007833691.1|GCF_000745855.1|Xenophilus_azovorans_DSM_13620|Betaproteobacteria|LPKKLY	ATG	None	None	TTCGACAGACTTTCACCTGATG
WP_045468732.1|GCF_000828975.1|Burkholderiales_bacterium_GJ-E10|Betaproteobacteria|LPKKLY	ATG	GGA/GAG/AGG	5-10bp	CCGCCTAGCGAGAACCCGGATG
WP_046115624.1|GCF_000969605.1|Aquincola_tertiaricarbonis|Betaproteobacteria|LPKKLY	ATG	AGGA/GGAG/GAGG	11-12bp	CCCCAGGATTTACCGTTACATG
WP_012346814.1|GCF_001044395.1|Caenimonas_sp._SL110|Betaproteobacteria|LPKKLY	ATG	GGA/GAG/AGG	11-12bp	ATCTGGAATTCACGAGCTGATG
WP_008811706.1|GCF_001182045.1|Dakarella_massiliensis|Betaproteobacteria|LPKKLY	ATG	GGA/GAG/AGG	5-10bp	TTAATCAAGGTTTTACTCAATG
WP_012346814.1|GCF_001262075.1|Ottowia_sp._oral_taxon_894|Betaproteobacteria|LPKKLY	ATG	None	None	ATGGAAAACCTTCATTTAAATG
WP_054018851.1|GCF_001293525.1|Ideonella_sakaiensis|Betaproteobacteria|LPKKLY	ATG	None	None	GGAACCCACCAATTTCTACATG
WP_007833691.1|GCF_001421705.1|Xylophilus_sp._Leaf220|Betaproteobacteria|LPKKLY	ATG	None	None	TCTCGGAAAACATTACGTAATG
WP_007833691.1|GCF_001422405.1|Pseudorhodoferax_sp._Leaf267|Betaproteobacteria|LPKKLY	ATG	None	None	AATTCAAGCCAACCGATACATG
WP_007833691.1|GCF_001424835.1|Variovorax_sp._Root318D1|Betaproteobacteria|LPKKLY	ATG	None	None	TCAGTTCAACGATTCATCAATG
WP_007833691.1|GCF_001428645.1|Acidovorax_sp._Root217|Betaproteobacteria|LPKKLY	ATG	GGA/GAG/AGG	11-12bp	ATTTGGAACACATTAGCTAATG
WP_009551973.1|GCF_001447195.1|Aquabacterium_parvum|Betaproteobacteria|LPKKLY	ATG	GGA/GAG/AGG	5-10bp	AAGCGCGAAGCAGGGGGCCATG
WP_007833691.1|GCF_001477625.1|Paucibacter_sp._KCTC_42545|Betaproteobacteria|LPKKLY	ATG	AGGA/GGAG/GAGG	11-12bp	TTGAAGGAATTACCTTTTCATG
WP_003262970.1|GCF_001484095.1|Ralstonia_solanacearum|Betaproteobacteria|LPKKLY	ATG	GGA/GAG/AGG	5-10bp	ATATTGAGCAAGGGACACGATG
WP_012346814.1|GCF_001571085.1|Azohydromonas_lata_NBRC_102462|Betaproteobacteria|LPKKLY	ATG	AGGA/GGAG/GAGG	11-12bp	CTGAAGGAAATCCCCTTTCATG
WP_009520186.1|GCF_001571205.1|Hydrogenophaga_intermedia_NBRC_102510|Betaproteobacteria|LPKKLY	ATG	AGGA/GGAG/GAGG	11-12bp	CTCAGGAATCGATCGATACATG
WP_012346814.1|GCF_001580455.1|Ramlibacter_tataouinensis|Betaproteobacteria|LPKKLY	ATG	GGA/GAG/AGG	5-10bp	ACTGAATATTCAGGATTGCATG
WP_005665410.1|GCF_001584225.1|Collimonas_pratensis|Betaproteobacteria|LPKKLY	ATG	None	None	AAACTTGGTTTGAATTTACATG
WP_019559597.1|GCF_001592165.1|Caldimonas_taiwanensis_NBRC_104434|Betaproteobacteria|LPKKLY	ATG	AGGA/GGAG/GAGG	11-12bp	TCAAGGATCCTCATTCTCAATG
WP_012346814.1|GCF_001653795.1|Mitsuaria_sp._7|Betaproteobacteria|LPKKLY	ATG	AGGA	5-10bp	CGCTATTTGAAGGAATTTCATG
WP_006576196.1|GCF_001658125.1|Cupriavidus_gilardii|Betaproteobacteria|LPKKLY	ATG	None	None	CTAACTCCACTTTTGGCACATG
WP_005665410.1|GCF_001866515.1|Massilia_timonae|Betaproteobacteria|LPKKLY	ATG	None	None	CCAACGGTTTGATTTTTACATG
WP_011903537.1|GCF_001870335.1|Polynucleobacter_asymbioticus|Betaproteobacteria|LPKKLY	ATG	GGA/GAG/AGG	5-10bp	ATATACGAGTTAAATAAGTATG
WP_009551973.1|GCF_001984095.1|Pelomonas_sp._KK5|Betaproteobacteria|LPKKLY	ATG	AGGA/GGAG/GAGG	11-12bp	TCATAGGAAATACCGTTAAATG
WP_007833691.1|GCF_002214645.1|Diaphorobacter_polyhydroxybutyrativorans|Betaproteobacteria|LPKKLY	ATG	None	None	TATTGGAAAACATTAGCTAATG
WP_008811706.1|GCF_002221595.1|Turicimonas_muris|Betaproteobacteria|LPKKLY	ATG	GGA/GAG/AGG	5-10bp	ATTTTAGTTTAGGTGCTAGATG
WP_099736161.1|GCF_002754475.1|Comamonas_sp._26|Betaproteobacteria|LPKKLY	ATG	GGA/GAG/AGG	5-10bp	AGATATATCTGGAAATTGAATG
WP_007833691.1|GCF_900103645.1|Oryzisolibacter_propanilivorax|Betaproteobacteria|LPKKLY	ATG	None	None	ATTTGGAAATTTTGAGCTGATG
WP_012346814.1|GCF_900109745.1|Roseateles_sp._YR242|Betaproteobacteria|LPKKLY	ATG	AGGA/GGAG/GAGG	11-12bp	TTGAAGGAATTCTTTTTTCATG
WP_007833691.1|GCF_900111115.1|Giesbergeria_anulus|Betaproteobacteria|LPKKLY	ATG	GGA/GAG/AGG	11-12bp	ATTTGGAAAACATTAGCTAATG
WP_011484193.1|GCF_900112285.1|Polaromonas_sp._OV174|Betaproteobacteria|LPKKLY	ATG	GGA/GAG/AGG	11-12bp	CTTTTGGATCAATTCATCAATG
WP_008811706.1|GCF_900128485.1|Duodenibacillus_massiliensis|Betaproteobacteria|LPKKLY	ATG	GGA/GAG/AGG	5-10bp	TAGGATTAGGTGCTTATCAATG
WP_073354181.1|GCF_900129055.1|Lampropedia_hyalina_DSM_16112|Betaproteobacteria|LPKKLY	ATG	None	None	CACAATCACATTTTTCTGAATG
WP_005665410.1|GCF_900188095.1|Noviherbaspirillum_humi|Betaproteobacteria|LPKKLY	ATG	GGA/GAG/AGG	5-10bp	CGGTTTAGATAGAGCTTACATG
WP_012695948.1|GCF_000021025.1|Laribacter_hongkongensis_HLHK9|Betaproteobacteria|LPPKLY	ATG	AGxAGG/AGGxGG	5-10bp	CCTAAGGTGGTGATTTTTCATG
WP_002924646.1|GCF_000021765.1|Thauera_sp._MZ1T|Betaproteobacteria|LPPKLY	ATG	AGGA	5-10bp	ACACCCAAGGAAGTCCGCAATG
WP_012807257.1|GCF_000024165.1|Candidatus_Accumulibacter_phosphatis_clade_IIA_str._UW-1|Betaproteobacteria|LPPKLY	ATG	GGA/GAG/AGG	5-10bp	TTGACCTTGGGATGAGTCGATG
WP_013030570.1|GCF_000025705.1|Sideroxydans_lithotrophicus_ES-1|Betaproteobacteria|LPPKLY	ATG	AGxAGG/AGGxGG	5-10bp	GGTAGAAGGTAGTTTGTCCATG
WP_011238288.1|GCF_000025965.1|Aromatoleum_aromaticum_EbN1|Betaproteobacteria|LPPKLY	ATG	AGGA	5-10bp	ACACACAAGGACGTTCGCAATG
WP_013292349.1|GCF_000145255.1|Gallionella_capsiferriformans_ES-2|Betaproteobacteria|LPPKLY	ATG	GGA/GAG/AGG	5-10bp	GGTAGAAGGTAGTTCGTAGATG
WP_008061479.1|GCF_000372885.1|Methyloversatilis_thermotolerans|Betaproteobacteria|LPPKLY	ATG	GGAG/GAGG	5-10bp	GCTCATTGAGGGCTGTTGTATG
WP_018607882.1|GCF_000373965.1|Uliginosibacterium_gangwonense_DSM_18521|Betaproteobacteria|LPPKLY	ATG	AGGA	5-10bp	TGCCTACCAAGGAACCAGAATG
WP_026262804.1|GCF_000374805.1|Chitiniphilus_shinanonensis_DSM_23277|Betaproteobacteria|LPPKLY	ATG	AGGA	5-10bp	CTTAACAGGATTTCGCTCGATG
WP_028537118.1|GCF_000422925.1|Paludibacterium_yongneupense_DSM_18731|Betaproteobacteria|LPPKLY	ATG	AGGA/GGAG/GAGG	11-12bp	GTTAAGGATATACACGTAAATG
WP_028453256.1|GCF_000428145.1|Chitinilyticum_litopenaei_DSM_21440|Betaproteobacteria|LPPKLY	ATG	AGGA	5-10bp	AGACAACAGGATTCGATTCATG
WP_008952516.1|GCF_000527175.1|Pseudogulbenkiania_sp._MAI-1|Betaproteobacteria|LPPKLY	ATG	AGGA	5-10bp	ATTTAAGGACACTAAGGTAATG
WP_028498085.1|GCF_000620105.1|Microvirgula_aerodenitrificans_DSM_15089|Betaproteobacteria|LPPKLY	ATG	None	None	AAAGGATTGGTGATTCTTCATG
WP_009205451.1|GCF_000971475.1|Sulfuricella_sp._T08|Betaproteobacteria|LPPKLY	ATG	GGA/GAG/AGG	5-10bp	AATTTAAGGTGATTTACTCATG
WP_047967786.1|GCF_001037925.1|Vogesella_sp._EB|Betaproteobacteria|LPPKLY	ATG	AGGA	5-10bp	TTTTAAGGACCTTCGCTAAATG
WP_011238288.1|GCF_001190925.1|Azoarcus_sp._CIB|Betaproteobacteria|LPPKLY	ATG	AGGA	5-10bp	ACACACAAGGAAGTTCGCAATG
WP_053936257.1|GCF_001294205.1|Amantichitinum_ursilacus|Betaproteobacteria|LPPKLY	ATG	AGGA	5-10bp	ACAACAGGATTTACGCTCGATG
WP_039756346.1|GCF_001302325.1|Gulbenkiania_mobilis|Betaproteobacteria|LPPKLY	ATG	AGGA	5-10bp	AGTTAAGGACCTCCACGTAATG
WP_011286295.1|GCF_001551835.1|Dechloromonas_denitrificans|Betaproteobacteria|LPPKLY	ATG	AGxAGG/AGGxGG	5-10bp	ACGGAAGGGGGTGATTTATATG
WP_031595712.1|GCF_001581915.1|Ferrovum_sp._Z-31|Betaproteobacteria|LPPKLY	ATG	GGAG/GAGG	5-10bp	GATTGAATCCGAGGTCTGAATG
WP_066612747.1|GCF_001619695.1|Crenobacter_luteus|Betaproteobacteria|LPPKLY	ATG	AGGA	5-10bp	AATTTAAGGATTTCAGCCCATG
WP_023886457.1|GCF_001648505.1|Eikenella_sp._NML97-A-109|Betaproteobacteria|LPPKLY	ATG	AGGA	5-10bp	ATATTTTAAGGATGACAAAATG
WP_070528210.1|GCF_001808185.1|Jeongeupia_sp._USM3|Betaproteobacteria|LPPKLY	ATG	AGGA	5-10bp	ATTAACAGGATATCGCTCGATG
WP_076018499.1|GCF_001953215.1|Betaproteobacteria_bacterium_GR16-43|Betaproteobacteria|LPPKLY	ATG	GGA/GAG/AGG	11-12bp	ATTCAGAGCACAGAGCCCCATG
WP_011137312.1|GCF_002081735.1|Chromobacterium_violaceum|Betaproteobacteria|LPPKLY	ATG	AGGA/GGAG/GAGG	11-12bp	TCTAAGGACCCTTAAGTACATG
WP_095523490.1|GCF_002284945.1|Candidatus_Dactylopiibacterium_carminicum|Betaproteobacteria|LPPKLY	ATG	AGGA	5-10bp	GTCCAGCAAGGAATACAGAATG
WP_046350429.1|GCF_002735645.1|Iodobacter_sp._BJB302|Betaproteobacteria|LPPKLY	ATG	AGGA	5-10bp	CGTAAAACAGGATTGCTCGATG
WP_004179462.1|GCF_900103145.1|Nitrosospira_sp._Nsp18|Betaproteobacteria|LPPKLY	ATG	AGGA/GGAG/GAGG	11-12bp	AGAAAGGAACCAAATCTTCATG
WP_028460937.1|GCF_900114305.1|Nitrosomonas_aestuarii|Betaproteobacteria|LPPKLY	ATG	GGA/GAG/AGG	5-10bp	TAGGAGATTCTGGATATTTATG
WP_004179462.1|GCF_900119085.1|Nitrosovibrio_sp._Nv17|Betaproteobacteria|LPPKLY	ATG	GGA/GAG/AGG	5-10bp	ACATGCAGGGGCTTGCCGCATG
WP_011371230.1|GCF_000012605.1|Hydrogenovibrio_crunogenus_XCL-2|Gammaproteobacteria	ATG	GGA/GAG/AGG	5-10bp	TTTAAAGAAAGAGTATATTATG
WP_011399974.1|GCF_000012985.1|Hahella_chejuensis_KCTC_2396|Gammaproteobacteria	ATG	GGA/GAG/AGG	5-10bp	CAGATCATAGAGAGGGGATATG
WP_011737609.1|GCF_000015105.1|Candidatus_Ruthia_magnifica_str._Cm_(Calyptogena_magnifica)|Gammaproteobacteria	ATG	AGGA	5-10bp	TTTTCATAAAGGAAAATACATG
WP_004089809.1|GCF_000019765.1|Xylella_fastidiosa_M23|Gammaproteobacteria	ATG	GGAG/GAGG	5-10bp	GTTTATTTATGGAGAATGCATG
WP_006460960.1|GCF_000214825.1|Thiomicrospira_cyclica_ALM1|Gammaproteobacteria	ATG	AGxAG	5-10bp	AATTTAAAGAAGAAGCTTTATG
WP_013975834.1|GCF_000219195.1|Candidatus_Tremblaya_princeps_PCIT|Betaproteobacteria	ATG	None	None	AACACAACCATACGGTTATATG
WP_002710445.1|GCF_000260135.1|Thiothrix_nivea_DSM_5205|Gammaproteobacteria	ATG	AGGA	5-10bp	GATTTGAGACAGGATTTTTATG
WP_017446030.1|GCF_000300815.1|Gayadomonas_joobiniege_G7|Gammaproteobacteria	ATG	GGAG/GAGG	5-10bp	TATCCTGAGGTGATATTTAATG
WP_018971772.1|GCF_000378125.1|Rudaea_cellulosilytica_DSM_22992|Gammaproteobacteria	ATG	GGAG/GAGG	5-10bp	ACTGTTTTTTGGAGTTTGCATG
WP_019557604.1|GCF_000381085.1|Thiomicrorhabdus_arctica_DSM_13458|Gammaproteobacteria	ATG	GGA/GAG/AGG	5-10bp	AAATCAATTAGGTAAAATTATG
WP_022952918.1|GCF_000419525.1|Leucothrix_mucor_DSM_2157|Gammaproteobacteria	ATG	GGA/GAG/AGG	11-12bp	TATTGAGAAGTCGAATTTTATG
WP_026817328.1|GCF_000426365.1|Arenimonas_composti_TR7-09_=_DSM_18010|Gammaproteobacteria	ATG	GGA/GAG/AGG	5-10bp	CAGAATCCAGAGAGTTCCTATG
WP_028770492.1|GCF_000429065.1|Silanimonas_lenta_DSM_16282|Gammaproteobacteria	ATG	GGA/GAG/AGG	5-10bp	GAAGCCCTCGAGAAGCCCTATG
WP_084331539.1|GCF_000510805.1|Ignatzschineria_larvae_DSM_13226|Gammaproteobacteria	ATG	None	None	TAAATTGGGGTGATGTTCAATG
WP_024869901.1|GCF_000519025.1|Pseudoxanthomonas_suwonensis_J43|Gammaproteobacteria	ATG	GGAG/GAGG	5-10bp	TTTGTGCCCCGGAGATTCCATG
WP_029213735.1|GCF_000745055.1|Luteibacter_sp._9145|Gammaproteobacteria	ATG	GGAG/GAGG	5-10bp	TTAAACAAGTGGAGTTTCCATG
WP_043099318.1|GCF_000761445.1|Oleiagrimonas_soli|Gammaproteobacteria	ATG	GGAG/GAGG	5-10bp	TTTACCAAGTGGAGATTCCATG
WP_019675131.1|GCF_000987775.1|Arsukibacterium_ikkense|Gammaproteobacteria	ATG	GGAG/GAGG	5-10bp	TGACCGAGGTGAGAATTTAATG
WP_047138278.1|GCF_001014645.1|Luteimonas_sp._FCS-9|Gammaproteobacteria	ATG	GGAG/GAGG	5-10bp	CCAGATCCCCGGAGATTCCATG
WP_048695958.1|GCF_001050375.1|Catenovulum_maritimum|Gammaproteobacteria	ATG	GGAG/GAGG	5-10bp	TATCCTGAGGTGATACTGAATG
WP_004142550.1|GCF_001057485.1|Cardiobacterium_hominis|Gammaproteobacteria	ATG	GGAG/GAGG	5-10bp	TTAACCAACGAGGAATCTGATG
WP_049724361.1|GCF_001187785.1|Wenzhouxiangella_marina|Gammaproteobacteria	ATG	GGA/GAG/AGG	5-10bp	ACATGGACCGGGAATTTTAATG
WP_012031388.1|GCF_001263335.1|Dichelobacter_nodosus|Gammaproteobacteria	ATG	AGGA	5-10bp	CTGGACAAAAGGATATTGAATG
WP_053101040.1|GCF_001267315.1|Oblitimonas_alkaliphila|Gammaproteobacteria	ATG	GGA/GAG/AGG	5-10bp	AGATGAAGGTACGATCTGGATG
WP_002551877.1|GCF_001440325.1|Pseudomonas_fluorescens|Gammaproteobacteria	ATG	GGA/GAG/AGG	5-10bp	TGAATGAAGGTAGCTCTGGATG
WP_008951050.1|GCF_001441695.1|Alishewanella_sp._WH16-1|Gammaproteobacteria	ATG	GGAG/GAGG	5-10bp	GGCCTGAGGTGAGAATTTAATG
WP_027671378.1|GCF_001513785.1|Rheinheimera_sp._EpRS3|Gammaproteobacteria	ATG	GGAG/GAGG	5-10bp	GCCCTGAGGTGAGAATTTAATG
WP_068386511.1|GCF_001580025.1|Ventosimonas_gracilis|Gammaproteobacteria	ATG	GGA/GAG/AGG	5-10bp	TGCACAAGGTACGAACTGGATG
WP_067058204.1|GCF_001591265.1|Moraxella_atlantae_NBRC_14588|Gammaproteobacteria	ATG	AGGAG	5-10bp	CAGACTTAAAGGAGTCTTCATG
WP_068857969.1|GCF_001676655.1|Perlucidibaca_aquatica|Gammaproteobacteria	ATG	GGA/GAG/AGG	5-10bp	TGAACCCAGGTGAGCATTCATG
WP_020025165.1|GCF_001682155.1|Candidatus_Thioglobus_singularis|Gammaproteobacteria	ATG	AGGA	5-10bp	ATCTTAAAGGAATTATTATATG
WP_068806579.1|GCF_001697225.1|Immundisolibacter_cernigliae|Gammaproteobacteria	ATG	GGAG/GAGG	5-10bp	AGGTTTCCAGAGGTATTGCATG
WP_072577610.1|GCF_001889065.1|Suttonella_ornithocola|Gammaproteobacteria	ATG	GGAG/GAGG	5-10bp	ATTTTTATGAGGATATTGAATG
WP_002808376.1|GCF_001929305.1|Xanthomonas_oryzae_pv._oryzicola|Gammaproteobacteria	ATG	GGAG/GAGG	5-10bp	CCCATTTTCTGGAGAACACATG
WP_026470322.1|GCF_001982605.1|Alkanindiges_sp._H1|Gammaproteobacteria	ATG	GGAG/GAGG	5-10bp	AACCTCCAGAGGATGTTACATG
WP_077411162.1|GCF_002000055.1|Marinicella_sp._F2|Gammaproteobacteria	ATG	GGA/GAG/AGG	5-10bp	TATTGGAGAGCACATACTGATG
WP_007081639.1|GCF_002001045.1|Rhodanobacter_sp._C01|Gammaproteobacteria	ATG	GGAG/GAGG	5-10bp	ATTACCACCCGGAGTTTCCATG
WP_081126196.1|GCF_002077135.1|Metallibacterium_scheffleri|Gammaproteobacteria	ATG	GGAG/GAGG	5-10bp	CAGTTTACCCGGAGTGCACATG
WP_008316464.1|GCF_002252265.1|Wohlfahrtiimonas_chitiniclastica|Gammaproteobacteria	ATG	None	None	CTAATTGGGGTGATGTTTAATG
WP_031371286.1|GCF_002355975.1|Lysobacter_enzymogenes|Gammaproteobacteria	ATG	GGA/GAG/AGG	5-10bp	TCCCTTAACGAGAAAACGTATG
WP_002808376.1|GCF_002738625.1|Stenotrophomonas_maltophilia|Gammaproteobacteria	ATG	GGAG/GAGG	5-10bp	ACTGTGTCCCGGAGATTCCATG
WP_018971772.1|GCF_900101825.1|Aquimonas_voraii|Gammaproteobacteria	ATG	GGAG/GAGG	5-10bp	AATCCGCACCGGAGATCCCATG
WP_091338499.1|GCF_900107845.1|Alkalimonas_amylolytica|Gammaproteobacteria	ATG	GGAG/GAGG	5-10bp	AAACCGAGGTGAGAATTTAATG
WP_014404075.1|GCF_900112865.1|Dyella_marensis|Gammaproteobacteria	ATG	GGAG/GAGG	5-10bp	TTTACCACTCGGAGTTTCCATG
WP_092405488.1|GCF_900115085.1|Dokdonella_immobilis|Gammaproteobacteria	ATG	GGAG/GAGG	5-10bp	GTTTAACAGCGGAGAGACTATG
WP_055999514.1|GCF_900115705.1|Frateuria_terrea|Gammaproteobacteria	ATG	GGAG/GAGG	5-10bp	TTTACCACCCGGAGTTTTCATG
WP_003085057.1|GCF_900119555.1|Azotobacter_vinelandii|Gammaproteobacteria	ATG	GGA/GAG/AGG	5-10bp	ATAGTTAAGGTAGCCCTGGATG
WP_072755861.1|GCF_900129205.1|Thermomonas_hydrothermalis|Gammaproteobacteria	ATG	GGA/GAG/AGG	5-10bp	TCCAGCCACGAGATTTCCGATG
WP_074201676.1|GCF_900141795.1|Sulfurivirga_caldicuralii|Gammaproteobacteria	ATG	GGA/GAG/AGG	5-10bp	ACAGGACGGAAACAGAATTATG
WP_015004912.1|GCF_900142045.1|Cycloclasticus_sp._DSM_27168|Gammaproteobacteria	ATG	GGA/GAG/AGG	5-10bp	TTTAAGAAGAGAGAAATACATG
WP_001136722.1|GCF_900161955.1|Acinetobacter_baumannii|Gammaproteobacteria	ATG	GGAG/GAGG	5-10bp	ATAATCTAGAGGATTTTACATG
WP_010195908.1|GCF_900163785.1|Psychrobacter_sp._JB385|Gammaproteobacteria	ATG	AGGAG	5-10bp	TCCTAATCGAGGAGTCTTCATG

## Sheet: Firmicutes_rbs_motif
accession	start codon	rbs_motif	rbs_spacer	rbs region
WP_000048055.1|GCF_001117865.1|Streptococcus_pneumoniae|Firmicutes	ATG	GGAG/GAGG	5-10bp	CTTGAAGGGAGTGAAAAAAATG
WP_000048060.1|GCF_900018255.1|Staphylococcus_aureus|Firmicutes	ATG	GGAGG	5-10bp	TGGAGGGAGGGAAATACAGATG
WP_000048061.1|GCF_002550555.1|Bacillus_cereus|Firmicutes	ATG	GGAGG	5-10bp	TCGGAGGGAGGGAAAGAGAATG
WP_002287321.1|GCF_001047545.1|Melissococcus_plutonius|Firmicutes	ATG	GGAGG	5-10bp	CTCGGAGGGAGGGAATTACATG
WP_002287321.1|GCF_001047545.1|Melissococcus_plutonius|Firmicutes	ATG	GGAGG	5-10bp	TCGGAGGGAGGGAATTAACATG
WP_002287321.1|GCF_001547115.1|Enterococcus_faecium|Firmicutes	ATG	GGAGG	5-10bp	CTCGGAGGGAGGGAATTACATG
WP_002287321.1|GCF_001547115.1|Enterococcus_faecium|Firmicutes	ATG	GGAGG	5-10bp	TCGGAGGGAGGGAATTAACATG
WP_002836438.1|GCF_001546385.1|Finegoldia_magna|Firmicutes	ATG	GGAGG	5-10bp	TAAAGAGGGGAGGGAAACCATG
WP_002884573.1|GCF_001832905.1|Floricoccus_tropicus|Firmicutes	ATG	3Base/5BMM	13-15bp	CGGGAAGTGGGTGAAAAATATG
WP_003147339.1|GCF_000185645.1|Gemella_morbillorum_M424|Firmicutes	ATG	GGAGG	5-10bp	CGGAGGGAGGGAAAATCCAATG
WP_003249064.1|GCF_001700985.1|Parageobacillus_thermoglucosidasius|Firmicutes	ATG	GGAGG	5-10bp	TCGGAGGGAGGGAAGCAGGATG
WP_003357777.1|GCF_000495435.3|Youngiibacter_fragilis_232.1|Firmicutes	ATG	GGAGG	5-10bp	GCGGAGGGAGGGATAAAGAATG
WP_003371500.1|GCF_001573795.1|Clostridium_botulinum|Firmicutes	ATG	GGAGG	5-10bp	GCGGAGGGAGGGATAGTAAATG
WP_003393897.1|GCF_000019045.1|Anoxybacillus_flavithermus_WK1|Firmicutes	ATG	GGAGG	5-10bp	TCGGAGGGAGGGAAGTAGGATG
WP_003719762.1|GCF_000728975.1|Listeria_monocytogenes|Firmicutes	ATG	GGAGG	5-10bp	CGGAGGGAGGGAAAGAGAGATG
WP_003776768.1|GCF_000315445.1|Alloiococcus_otitis_ATCC_51267|Firmicutes	TTG	GGAGG	5-10bp	CGAGGGGAGGGGAACTGCATTG
WP_004227078.1|GCF_000518005.1|Viridibacillus_arenosi_FSL_R5-213|Firmicutes	ATG	GGAGG	5-10bp	CGGAGGGAGGGAAAGAGAGATG
WP_004227078.1|GCF_000518005.1|Viridibacillus_arenosi_FSL_R5-213|Firmicutes	ATG	GGAG/GAGG	5-10bp	CGGAGGGAGAGAAAGAGAGATG
WP_004227078.1|GCF_001592865.1|[Bacillus]_sp._KCTC_13219|Firmicutes	ATG	GGAGG	5-10bp	CGGAGGGAGGGAAAGAGAGATG
WP_004227078.1|GCF_001592865.1|[Bacillus]_sp._KCTC_13219|Firmicutes	ATG	GGAG/GAGG	5-10bp	CGGAGGGAGAGAAAGAGAGATG
WP_004227078.1|GCF_001617605.1|Rummeliibacillus_stabekisii|Firmicutes	ATG	GGAGG	5-10bp	CGGAGGGAGGGAAAGAGAGATG
WP_004227078.1|GCF_001617605.1|Rummeliibacillus_stabekisii|Firmicutes	ATG	GGAG/GAGG	5-10bp	CGGAGGGAGAGAAAGAGAGATG
WP_004227078.1|GCF_001677985.1|Solibacillus_silvestris|Firmicutes	ATG	GGAGG	5-10bp	CGGAGGGAGGGAAAGAGAGATG
WP_004227078.1|GCF_001677985.1|Solibacillus_silvestris|Firmicutes	ATG	GGAG/GAGG	5-10bp	CGGAGGGAGAGAAAGAGAGATG
WP_004227078.1|GCF_001700315.1|Caryophanon_tenue|Firmicutes	ATG	GGAGG	5-10bp	CGGAGGGAGGGAAAGAGAGATG
WP_004227078.1|GCF_001700315.1|Caryophanon_tenue|Firmicutes	ATG	GGAG/GAGG	5-10bp	CGGAGGGAGAGAAAGAGAGATG
WP_004636227.1|GCF_000245815.1|Dolosigranulum_pigrum_ATCC_51524|Firmicutes	ATG	GGAGG	5-10bp	GACGAGGGGAGGTTCAGTCATG
WP_004832359.1|GCF_000223315.1|Parvimonas_sp._oral_taxon_393_str._F0440|Firmicutes	ATG	GGAG/GAGG	5-10bp	ATAAGAGAGGGGGGATATCATG
WP_005605651.1|GCF_900111135.1|Granulicatella_balaenopterae|Firmicutes	ATG	GGAGG	5-10bp	CGGAGGGAGGGAAAAGAATATG
WP_005805980.1|GCF_000283555.1|Candidatus_Arthromitus_sp._SFB-rat-Yit|Firmicutes	ATG	GGAGG	5-10bp	AGCGGAGGGAGGGAAATATATG
WP_006417488.1|GCF_000428865.1|Eremococcus_coleocola_DSM_15696|Firmicutes	ATG	AGGAGG	5-10bp	CTCGGGAGGAGGGGATCATATG
WP_006828698.1|GCF_001687585.2|Planococcus_halocryophilus|Firmicutes	ATG	GGAGG	5-10bp	CGGAGGGAGGGAAAAAGAGATG
WP_006907774.1|GCF_000413455.1|Facklamia_hominis_ACS-120-V-Sch10|Firmicutes	ATG	GGAGG	5-10bp	TCGGAGGGAGGGGAACCATATG
WP_008431605.1|GCF_001270075.1|Planomicrobium_glaciei|Firmicutes	ATG	GGAGG	5-10bp	CGGAGGGAGGGAAAAAGAGATG
WP_008879912.1|GCF_000733845.1|Geobacillus_vulcani_PSS1|Firmicutes	ATG	GGAGG	5-10bp	TCGGAGGGAGGGAAGCAGGATG
WP_009431570.1|GCF_900232945.1|Urinacoccus_sp._Marseille-P3926|Firmicutes	ATG	AGGAGG	5-10bp	AAATGAGAGGAGGGAAATTATG
WP_009490206.1|GCF_000313915.1|Catellicoccus_marimammalium_M35/04/3|Firmicutes	ATG	GGAGG	5-10bp	TCGGAGGGAGGGAATTTAAATG
WP_010053707.1|GCF_900005095.1|Carnobacterium_maltaromaticum|Firmicutes	ATG	GGAGG	5-10bp	CGGAGGGAGGGAATTTAATATG
WP_016426884.1|GCF_900115805.1|Psychrobacillus_psychrotolerans|Firmicutes	ATG	GGAGG	5-10bp	CGGAGGGAGGGAAAAAGAGATG
WP_017186148.1|GCF_000269905.1|Alkalibacillus_haloalkaliphilus_C5|Firmicutes	ATG	GGAGG	5-10bp	TTTGGAGGGAGGGTAGAGCATG
WP_017380145.1|GCF_000297555.1|Paenisporosarcina_sp._TG-14|Firmicutes	ATG	AGxAGG/AGGxGG	5-10bp	CGGAGGGGGGGAAAGAGAGATG
WP_017472618.1|GCF_000306965.1|Amphibacillus_jilinensis_Y1|Firmicutes	ATG	GGAGG	5-10bp	CGGAGGGAGGGAAATTAGCATG
WP_017548804.1|GCF_900114445.1|Salinicoccus_halodurans|Firmicutes	ATG	GGAGG	5-10bp	TTCGGAGGGAGGGAAAACCATG
WP_018393973.1|GCF_900156125.1|Domibacillus_enclensis|Firmicutes	ATG	GGAGG	5-10bp	CGGAGGGAGGGAAAAAGAAATG
WP_018658835.1|GCF_000374325.1|Allofustis_seminis_DSM_15817|Firmicutes	TTG	GGAGG	5-10bp	ACGAGGGGAGGGAAGAACGTTG
WP_018931586.1|GCF_000377765.1|Gracilibacillus_lacisalsi_DSM_19029|Firmicutes	ATG	GGAGG	5-10bp	CGGAGGGAGGGAAATTAGCATG
WP_018931586.1|GCF_000377765.1|Gracilibacillus_lacisalsi_DSM_19029|Firmicutes	ATG	GGAG/GAGG	5-10bp	GACATATGTGAGGTTACATATG
WP_019134077.1|GCF_000311985.1|Kallipyga_massiliensis_ph2|Firmicutes	TTG	AGxAGG/AGGxGG	5-10bp	GCTCCAAGGGGGTGAGAATTTG
WP_019190219.1|GCF_000308275.2|Levyella_massiliensis|Firmicutes	ATG	AGxAGG/AGGxGG	5-10bp	ACCCGAGGGGGGTGAAAATATG
WP_019192107.1|GCF_000312325.1|Casaltella_massiliensis|Firmicutes	ATG	AGxAGG/AGGxGG	5-10bp	ACGAGAGGGGGGATAGAGAATG
WP_019213754.1|GCF_000312505.2|Fenollaria_massiliensis|Firmicutes	ATG	GGAGG	5-10bp	TTATGAGGGGAGGGATACTATG
WP_019213754.1|GCF_001811395.1|Anaerosphaera_sp._HMSC064C01|Firmicutes	ATG	GGAGG	5-10bp	TTATGAGGGGAGGGATACTATG
WP_019377991.1|GCF_001038425.2|Ornithinibacillus_contaminans|Firmicutes	ATG	GGAGG	5-10bp	CGGAGGGAGGGAAATTAGCATG
WP_020153979.1|GCF_001587535.1|Caldibacillus_debilis|Firmicutes	GTG	GGAGG	5-10bp	TTTGGAGGGAGGGATAAAAGTG
WP_021801013.1|GCF_001403615.1|Desnuesiella_massiliensis|Firmicutes	ATG	GGAGG	5-10bp	GCGGAGGGAGGGATATTAGATG
WP_022796477.1|GCF_000421665.1|Bavariicoccus_seileri_DSM_19936|Firmicutes	ATG	4Base/6BMM	13-15bp	AAAGGACATTTTGTTTTAAATG
WP_022796477.1|GCF_000421665.1|Bavariicoccus_seileri_DSM_19936|Firmicutes	ATG	GGAGG	5-10bp	GGAGGGAGGGAATCAAATTATG
WP_022796477.1|GCF_000526675.1|Atopobacter_phocae_ATCC_BAA-285|Firmicutes	ATG	4Base/6BMM	13-15bp	AAAGGACATTTTGTTTTAAATG
WP_022796477.1|GCF_000526675.1|Atopobacter_phocae_ATCC_BAA-285|Firmicutes	ATG	GGAGG	5-10bp	GGAGGGAGGGAATCAAATTATG
WP_025747111.1|GCF_000526435.1|Caldicoprobacter_oshimai_DSM_21659|Firmicutes	ATG	GGAGG	5-10bp	GCGGAGGGAGGGAGAAGGCATG
WP_026858185.1|GCF_900101065.1|Jeotgalicoccus_halophilus|Firmicutes	ATG	GGAGG	5-10bp	TCGGAGGGAGGGAAAACAAATG
WP_026893684.1|GCF_000620125.1|Clostridiisalibacter_paucivorans_DSM_22131|Firmicutes	ATG	GGAGG	5-10bp	AGAGGGGAGGGAGATGTAGATG
WP_026906232.1|GCF_000482485.1|Paucisalibacillus_globulus_DSM_18846|Firmicutes	ATG	GGAGG	5-10bp	CGGAGGGAGGGAAATTAGCATG
WP_027108475.1|GCF_000425865.1|Lacticigenium_naphtae_DSM_19658|Firmicutes	ATG	GGAGG	5-10bp	CGGAGGGAGGGAATTAAATATG
WP_027348486.1|GCF_000423145.1|Helcococcus_sueciensis_DSM_17243|Firmicutes	ATG	GGA/GAG/AGG	5-10bp	AATGTTCAGGTAAACCTCAATG
WP_027447662.1|GCF_000775605.1|Pontibacillus_marinus_BH030004_=_DSM_16465|Firmicutes	ATG	GGAGG	5-10bp	TTGGAGGGAGGGAAATAGCATG
WP_027955353.1|GCF_900166575.1|Halobacillus_salinus|Firmicutes	ATG	GGAGG	5-10bp	TCGGAGGGAGGGAAATTGCATG
WP_027963475.1|GCF_000423105.1|Halalkalibacillus_halophilus_DSM_18494|Firmicutes	ATG	GGAGG	5-10bp	TTTGGAGGGAGGGTAGAGCATG
WP_028274182.1|GCF_000429585.1|Atopococcus_tabaci_DSM_17538|Firmicutes	ATG	GGAGG	5-10bp	CGGAGGGAGGGAATCGAATATG
WP_029054680.1|GCF_002743325.1|Sporosarcina_sp._P31|Firmicutes	ATG	GGAGG	5-10bp	GGAGGGAGGGACAAGAGATATG
WP_029091162.1|GCF_001715775.1|Brochothrix_thermosphacta|Firmicutes	ATG	GGAGG	5-10bp	GCGGAGGGAGGGTTAAGAGATG
WP_031573182.1|GCF_900099635.1|Proteiniclasticum_ruminis|Firmicutes	ATG	GGAGG	5-10bp	GCGGAGGGAGGGATAATGAATG
WP_035364261.1|GCF_001815865.1|Abiotrophia_sp._HMSC24B09|Firmicutes	ATG	AGGAGG	5-10bp	CTTGGGAGGAGGGGATTATATG
WP_035364261.1|GCF_001815865.1|Abiotrophia_sp._HMSC24B09|Firmicutes	ATG	GGAGG	5-10bp	CTCGGAGGGAGGGAAACCCATG
WP_035364261.1|GCF_900110675.1|Ignavigranum_ruoffiae|Firmicutes	ATG	AGGAGG	5-10bp	CTTGGGAGGAGGGGATTATATG
WP_035364261.1|GCF_900110675.1|Ignavigranum_ruoffiae|Firmicutes	ATG	GGAGG	5-10bp	CTCGGAGGGAGGGAAACCCATG
WP_035380237.1|GCF_000601455.1|Fervidicella_metallireducens_AeB|Firmicutes	ATG	GGAGG	5-10bp	GCGGAGGGAGGGAGATTAAATG
WP_039238310.1|GCF_000818695.2|Quasibacillus_thermotolerans|Firmicutes	ATG	GGAGG	5-10bp	CGGAGGGAGGGAAAGAGATATG
WP_040397353.1|GCF_001182725.1|Anaerococcus_sp._SB3|Firmicutes	ATG	GGAG/GAGG	5-10bp	TACGAGAGGGGGGATAGAGATG
WP_040928386.1|GCF_000438455.1|Nosocomiicoccus_massiliensis|Firmicutes	ATG	GGAGG	5-10bp	TCGGAGGGAGGGGAACACGATG
WP_041701729.1|GCF_000299355.1|Gottschalkia_acidurici_9a|Firmicutes	ATG	GGAGG	5-10bp	TGAGGGGAGGGAGAATCGAATG
WP_042680772.1|GCF_000751555.1|Anaerosalibacter_massiliensis|Firmicutes	ATG	GGAGG	5-10bp	TGAGGGGAGGGAGAAATAAATG
WP_044158196.1|GCF_900111405.1|Salinibacillus_kushneri|Firmicutes	ATG	GGAGG	5-10bp	TGGAGGGAGGGAAAAAAGCATG
WP_046444557.1|GCF_000981035.1|Catabacter_hongkongensis|Firmicutes	ATG	AGGAGG	5-10bp	ACGGGAGGAGGGGAGATCAATG
WP_046444557.1|GCF_000981035.1|Catabacter_hongkongensis|Firmicutes	ATG	AGGAGG	5-10bp	ACGGGAGGAGGGGAGATTAATG
WP_046444557.1|GCF_001678855.1|Christensenella_minuta|Firmicutes	ATG	AGGAGG	5-10bp	ACGGGAGGAGGGGAGATCAATG
WP_046444557.1|GCF_001678855.1|Christensenella_minuta|Firmicutes	ATG	AGGAGG	5-10bp	ACGGGAGGAGGGGAGATTAATG
WP_047183793.1|GCF_900176885.1|Oceanobacillus_senegalensis|Firmicutes	ATG	GGAGG	5-10bp	CGGAGGGAGGGAAATTAGCATG
WP_047389927.1|GCF_900113675.1|Pisciglobus_halotolerans|Firmicutes	ATG	AGxAGG/AGGxGG	5-10bp	CGGAGGGGGGTAAAGAAATATG
WP_053957570.1|GCF_001282725.1|Inediibacterium_massiliense|Firmicutes	ATG	GGAGG	5-10bp	CGGAGGGAGGGAAAATTATATG
WP_054251921.1|GCF_001299475.1|Neofamilia_massiliensis|Firmicutes	ATG	GGAGG	5-10bp	TACGAAGGGAGGGATTTAGATG
WP_054753022.1|GCF_900110685.1|Piscibacillus_halophilus|Firmicutes	ATG	GGAGG	5-10bp	TTTGGAGGGAGGGTTGAGCATG
WP_054875316.1|GCF_001317355.1|Oxobacter_pfennigii|Firmicutes	ATG	GGAGG	5-10bp	GCGGAGGGAGGGAGAAATAATG
WP_055079178.1|GCF_001407835.1|Lagierella_massiliensis|Firmicutes	ATG	GGAGG	5-10bp	AAGAGGGGAGGGGAAACCTATG
WP_062198703.1|GCF_001375675.1|Massilibacterium_senegalense|Firmicutes	ATG	GGAGG	5-10bp	CGGAGGGAGGGAAAGAAAAATG
WP_062469427.1|GCF_002005405.1|Jeotgalibaca_dankookensis|Firmicutes	ATG	GGAGG	5-10bp	TCGGAGGGAGGGAATATTAATG
WP_063388032.1|GCF_002243625.1|Aeribacillus_pallidus|Firmicutes	ATG	GGAGG	5-10bp	TCGGAGGGAGGGAAAAAGGATG
WP_066126806.1|GCF_001552295.1|Globicatella_sanguinis_NBRC_15551|Firmicutes	ATG	GGAGG	5-10bp	TTGGAGGGAGGGGAATCATATG
WP_066924319.1|GCF_900119705.1|Murdochiella_vaginalis|Firmicutes	ATG	AGxAGG/AGGxGG	5-10bp	ACCCGAGGGGGGTGAAAAAATG
WP_067837072.1|GCF_001368815.1|Paraliobacillus_sp._PM-2|Firmicutes	ATG	GGAGG	5-10bp	CGGAGGGAGGGAAATTAGCATG
WP_067837072.1|GCF_001368815.1|Paraliobacillus_sp._PM-2|Firmicutes	ATG	GGAG/GAGG	5-10bp	GACATATGTGAGGTTACATATG
WP_067837072.1|GCF_900103695.1|Sediminibacillus_halophilus|Firmicutes	ATG	GGAGG	5-10bp	CGGAGGGAGGGAAATTAGCATG
WP_067837072.1|GCF_900103695.1|Sediminibacillus_halophilus|Firmicutes	ATG	GGAG/GAGG	5-10bp	GACATATGTGAGGTTACATATG
WP_067977179.1|GCF_900103385.1|Aerococcus_urinaehominis|Firmicutes	ATG	GGAGG	5-10bp	CGAGGGGAGGGGAAAATCCATG
WP_068367335.1|GCF_900088125.1|Peptoniphilus_sp._KHD5|Firmicutes	ATG	GGAGG	5-10bp	AAAGAGGGGAGGGGAAATCATG
WP_068555936.1|GCF_001562415.1|Thermotalea_metallivorans|Firmicutes	ATG	GGAGG	5-10bp	GCGGAGGGAGGGAAATTATATG
WP_068709411.1|GCF_001544195.1|Tetragenococcus_solitarius_NBRC_100494|Firmicutes	ATG	GGAGG	5-10bp	CTCGGAGGGAGGGAATTATATG
WP_069974103.1|GCF_001750685.1|Geosporobacter_ferrireducens|Firmicutes	ATG	GGAGG	5-10bp	CGGAGGGAGGGAGAATTATATG
WP_071062530.1|GCF_001855385.1|Andreesenia_angusta|Firmicutes	ATG	GGAGG	5-10bp	TTGAGGGGAGGGAGAATGTATG
WP_071139004.1|GCF_900095615.1|Sporanaerobacter_sp._PP17-6a|Firmicutes	ATG	GGAGG	5-10bp	AGAGGGGAGGGAAAAGTAAATG
WP_072514456.1|GCF_900120375.1|Ndongobacter_massiliensis|Firmicutes	ATG	GGAGG	5-10bp	AATCGGAGGGGGTGAAGAAATG
WP_072694955.1|GCF_900163775.1|Marinilactibacillus_psychrotolerans_42ea|Firmicutes	ATG	GGAGG	5-10bp	CGAGGGGAGGGGAAGAACGATG
WP_072694955.1|GCF_900163775.1|Marinilactibacillus_psychrotolerans_42ea|Firmicutes	TTG	GGAGG	5-10bp	CGAGGGGAGGGGAACAACGTTG
WP_072971785.1|GCF_900128955.1|Tissierella_praeacuta_DSM_18095|Firmicutes	ATG	AGGAGG	5-10bp	AGAGAGGAGGGAGAAGTCGATG
WP_073025248.1|GCF_900142105.1|Lutispora_thermophila_DSM_19022|Firmicutes	ATG	GGAGG	5-10bp	CGGAGGGAGGGTGAGTTAGATG
WP_073298332.1|GCF_900129085.1|Atopostipes_suicloacalis_DSM_15692|Firmicutes	TTG	GGAGG	5-10bp	ATGAGGGGAGGTAAGGACGTTG
WP_074350523.1|GCF_900095305.1|Proteiniborus_sp._DW1|Firmicutes	ATG	GGAGG	5-10bp	TTGAGGGGAGGGAGAACGAATG
WP_076556362.1|GCF_900156645.1|Salimicrobium_flavidum|Firmicutes	ATG	GGAGG	5-10bp	TCGGAGGGAGGGAAGTAGTATG
WP_076757758.1|GCF_900156305.1|Edaphobacillus_lindanitolerans|Firmicutes	ATG	GGAGG	5-10bp	CGGAGGGAGGGGAAAAGACATG
WP_077140130.1|GCF_001989575.1|Auricoccus_indicus|Firmicutes	ATG	GGAGG	5-10bp	TCGGAGGGAGGGAAAACACATG
WP_077308578.1|GCF_002272065.1|Terribacillus_saccharophilus|Firmicutes	ATG	GGAGG	5-10bp	CGGAGGGAGGGAAATTAGCATG
WP_078806466.1|GCF_900167335.1|Pilibacter_termitis|Firmicutes	ATG	GGAGG	5-10bp	CGGAGGGAGGGAATTTTTTATG
WP_086627850.1|GCF_900114465.1|Trichococcus_palustris|Firmicutes	ATG	GGAGG	5-10bp	CGGAGGGAGGGAATAGTTAATG
WP_086951372.1|GCF_900163795.1|Vagococcus_fluvialis_bH819|Firmicutes	ATG	GGAGG	5-10bp	TTTGGAGGGAGGGATTTATATG
WP_087677477.1|GCF_900167305.1|Garciella_nitratireducens_DSM_15102|Firmicutes	GTG	GGAGG	5-10bp	AGCGGAGGGAGGGAAATGTGTG
WP_089829195.1|GCF_900115605.1|Halolactibacillus_halophilus|Firmicutes	ATG	GGAGG	5-10bp	CGGAGGGAGGGAAATTAGCATG
WP_090794468.1|GCF_900096905.1|Pelagirhabdus_alkalitolerans|Firmicutes	ATG	GGAGG	5-10bp	CGGAGGGAGGGAAATTAGCATG
WP_091263960.1|GCF_900101165.1|Alkalibacterium_thalassium|Firmicutes	ATG	GGAGG	5-10bp	CGAGGGGAGGGGAAGAACGATG
WP_091263960.1|GCF_900101165.1|Alkalibacterium_thalassium|Firmicutes	TTG	GGAGG	5-10bp	CGAGGGGAGGGGAACAACGTTG
WP_091473539.1|GCF_900110815.1|Aliicoccus_persicus|Firmicutes	ATG	GGAGG	5-10bp	TCGAGGGGAGGGTAAATGAATG
WP_092084215.1|GCF_900100125.1|Dolosicoccus_paucivorans|Firmicutes	ATG	GGAGG	5-10bp	TCGGAGGGAGGGGAACCTAATG
WP_092096762.1|GCF_900101985.1|Bhargavaea_beijingensis|Firmicutes	ATG	GGAGG	5-10bp	CGGAGGGAGGGGAAAAGACATG
WP_092479968.1|GCF_900115825.1|Desemzia_incerta|Firmicutes	ATG	AGxAGG/AGGxGG	5-10bp	CGGAGGGGGGTAATTGAATATG
WP_092492519.1|GCF_900110695.1|Virgibacillus_subterraneus|Firmicutes	ATG	GGAGG	5-10bp	CGGAGGGAGGGAAATTAGCATG
WP_092650395.1|GCF_900111355.1|Isobaculum_melis|Firmicutes	ATG	GGAGG	5-10bp	CGGAGGGAGGGAATTTAATATG
WP_093750771.1|GCF_900106765.1|Tepidimicrobium_xylanilyticum|Firmicutes	ATG	GGAGG	5-10bp	AGAGGGGAGGGAGAAGTTCATG
WP_093856130.1|GCF_900103915.1|Tenuibacillus_multivorans|Firmicutes	ATG	GGAGG	5-10bp	TTCGGAGGGAGGGTTGAGCATG
WP_095134000.1|GCF_002270055.1|Anaeromicrobium_sediminis|Firmicutes	ATG	GGAGG	5-10bp	CGGAGGGAGGGAGAAGTAGATG
WP_100010606.1|GCF_002763455.1|Lentibacillus_sediminis|Firmicutes	ATG	GGAGG	5-10bp	CGGAGGGAGGGAAATTAGCATG

## Sheet: CPR_rbs_motif
accession	start codon	rbs_motif	rbs_spacer	rbs region
AGL62419.1|GCA_000392435.1|Candidatus_Saccharimonas_aalborgensis|CPR	ATG	GGA/GAG/AGG	3-4bp	CTGTTACAATGTGAGCGATATG
AKM79108.1|GCA_001029675.1|Candidatus_Beckwithbacteria_bacterium_GW2011_GWC1_49_16|CPR	ATG	None	None	AAGGGGGTGGATTTTTTAAATG
KKP74342.1|GCA_000990655.1|Candidatus_Woesebacteria_bacterium_GW2011_GWE1_35_20|CPR	ATG	ATA	3bp	GCCAAAGGGCGAAATAAATATG
KKQ48912.1|GCA_000992255.1|Candidatus_Woesebacteria_bacterium_GW2011_GWD1_38_10|CPR	ATG	None	None	TGGAAGGAGGCGATTTCATATG
KKQ65095.1|GCA_000992605.1|Candidatus_Shapirobacteria_bacterium_GW2011_GWF1_38_23|CPR	ATG	TAA	12bp	GTATTAAGGAGGTGAGCTAATG
KKQ74435.1|GCA_000992855.1|Candidatus_Woesebacteria_bacterium_GW2011_GWB1_38_5b|CPR	ATG	None	None	GAAAGGAGGCGAAACTAAAATG
KKR18666.1|GCA_000995065.1|candidate_division_CPR2_bacterium_GW2011_GWC2_39_35|CPR	TTG	AGGAGG	5-10bp	GTAAAGGAGGTGATTTTTTTTG
KKR29496.1|GCA_000995395.1|candidate_division_CPR2_bacterium_GW2011_GWD2_39_7|CPR	TTG	AGGAGG	5-10bp	GTAAAGGAGGTGATTTTTTTTG
KKR29721.1|GCA_000995385.1|candidate_division_CPR2_bacterium_GW2011_GWD1_39_7|CPR	TTG	AGGAGG	5-10bp	GTAAAGGAGGTGATTTTTTTTG
KKR36079.1|GCA_000995565.1|candidate_division_CPR2_bacterium_GW2011_GWC1_39_9|CPR	TTG	AGGAGG	5-10bp	ATAGAGGAGGTGATTTTTTTTG
KKR87910.1|GCA_000996345.2|Candidatus_Curtissbacteria_bacterium_GW2011_GWA1_41_11|CPR	ATG	TAA	3bp	AAGGGGGTGTTTTTAATATATG
KKS09651.1|GCA_000997185.1|candidate_division_CPR2_bacterium_GW2011_GWC1_41_48|CPR	TTG	AGGAGG	5-10bp	GTAAAGGAGGTGATTTTTTTTG
KKU35341.1|GCA_001002615.1|Candidatus_Beckwithbacteria_bacterium_GW2011_GWA1_46_30|CPR	ATG	None	None	AAGGGGGTGGATTTTTTAAATG
KKU38079.1|GCA_001002655.1|Candidatus_Amesbacteria_bacterium_GW2011_GWA1_46_35|CPR	ATG	TAA	4bp	GGAGGGATGAAATAATTTTATG
KKU70169.1|GCA_001001215.1|Candidatus_Woesebacteria_bacterium_GW2011_GWD1_47_21|CPR	ATG	None	None	TGGAAGGGGGCGAATCTAAATG
KKU97882.1|GCA_001003585.1|Candidatus_Amesbacteria_bacterium_GW2011_GWB1_48_13|CPR	ATG	ATGAT	5bp	AAGGGGGGGATGATGTACAATG
KKW03737.1|GCA_001003755.1|Candidatus_Beckwithbacteria_bacterium_GW2011_GWC2_49_11|CPR	ATG	None	None	AAGGGGGTGGATTTTTTAAATG
KPJ70082.1|GCA_001303005.1|Microgenomates_bacterium_DG_75|CPR	GTG	None	None	AAGAAAGTTGAGGAAGGGGGTG
KUK79688.1|GCA_001508535.1|Microgenomates_bacterium_39_7|CPR	ATG	AATAT	15bp	ATATTCAAAAAGAAATCATATG
OGC97064.1|GCA_001773615.1|Candidatus_Amesbacteria_bacterium_RIFCSPHIGHO2_01_FULL_48_32|CPR	ATG	ATGAT	3bp	GGGGGGGTGAAATGATTTTATG
OGD62872.1|GCA_001776045.1|Candidatus_Beckwithbacteria_bacterium_RBG_13_42_9|CPR	ATG	None	None	AAGGGGGTGTTTTTGAAAGATG
OGD84205.1|GCA_001776285.1|Candidatus_Collierbacteria_bacterium_RIFOXYD1_FULL_46_26|CPR	ATG	3Base/5BMM	13-15bp	AAGGGGGTGTTGATAATTAATG
OGD85991.1|GCA_001774815.1|Candidatus_Curtissbacteria_bacterium_RIFCSPHIGHO2_01_FULL_41_13|CPR	ATG	TAA	3bp	GGAAACTGGAGTTTAATGAATG
OGD96258.1|GCA_001775005.1|Candidatus_Curtissbacteria_bacterium_RIFCSPLOWO2_01_FULL_41_28|CPR	ATG	None	None	GAGGGGGTGTTTTTTATAAATG
OGE08836.1|GCA_001776535.1|Candidatus_Curtissbacteria_bacterium_RIFCSPLOWO2_02_FULL_40_13b|CPR	ATG	TAA	3bp	AGAGGCGGTGTTTTAATTTATG
OGE20326.1|GCA_001776675.1|Candidatus_Daviesbacteria_bacterium_RIFCSPHIGHO2_01_FULL_43_17|CPR	ATG	None	None	AAGGAGGTGCTTTTTTTACATG
OGE25773.1|GCA_001776975.1|Candidatus_Daviesbacteria_bacterium_RIFCSPHIGHO2_01_FULL_41_45|CPR	ATG	None	None	GGAGGTGTTTTTATTTTTTATG
OGE40630.1|GCA_001776775.1|Candidatus_Daviesbacteria_bacterium_RIFCSPHIGHO2_02_FULL_43_12|CPR	ATG	None	None	CTTGGTTTAGGCAAAAAATATG
OGE44878.1|GCA_001776815.1|Candidatus_Daviesbacteria_bacterium_RIFCSPHIGHO2_12_FULL_38_25|CPR	ATG	None	None	GGAGGTGTATTTTTGACTAATG
OGG01897.1|GCA_001779095.1|Candidatus_Gottesmanbacteria_bacterium_RBG_16_52_11|CPR	ATG	None	None	GTCAAAATAATTTACGATTATG
OGG25121.1|GCA_001779275.1|Candidatus_Gottesmanbacteria_bacterium_RIFCSPHIGHO2_12_FULL_40_13|CPR	ATG	None	None	GGAGGTGTTTTTTACATTCATG
OGG32758.1|GCA_001779385.1|Candidatus_Gottesmanbacteria_bacterium_RIFCSPLOWO2_02_FULL_40_10|CPR	ATG	None	None	GGAGGTGTTTTTTACATTCATG
OGH18611.1|GCA_001782125.1|Candidatus_Levybacteria_bacterium_RIFCSPHIGHO2_01_FULL_40_15b|CPR	ATG	ATAA	3bp	AGGAGGTGCTTTATAAATTATG
OGH19399.1|GCA_001783775.1|Candidatus_Levybacteria_bacterium_RIFCSPHIGHO2_01_FULL_38_12|CPR	ATG	None	None	TAATGATAGGTGGTGTTTTATG
OGH42930.1|GCA_001784055.1|Candidatus_Levybacteria_bacterium_RIFCSPLOWO2_01_FULL_42_15|CPR	ATG	None	None	TAGAAGGAGGTGTTTATTTATG
OGJ38924.1|GCA_001787385.1|Candidatus_Pacebacteria_bacterium_RIFCSPLOWO2_01_FULL_47_12|CPR	ATG	None	None	ACGGTATAATCACTGCCCTATG
OGJ40928.1|GCA_001787375.1|Candidatus_Pacebacteria_bacterium_RIFOXYC1_FULL_39_21|CPR	ATG	GGAGG	5-10bp	GAGAAGGGAGGTGAGAAATATG
OGJ42553.1|GCA_001787455.1|Candidatus_Peregrinibacteria_bacterium_RIFCSPLOWO2_01_FULL_39_12|CPR	ATG	None	None	AAAAGGAGGTGAGAATAAAATG
OGK14953.1|GCA_001789365.1|Candidatus_Roizmanbacteria_bacterium_RIFCSPHIGHO2_01_FULL_39_12b|CPR	ATG	None	None	GAAAGGGGGAGCAAACTCGATG
OGK17249.1|GCA_001787945.1|Candidatus_Roizmanbacteria_bacterium_RIFCSPHIGHO2_01_FULL_39_24|CPR	ATG	TAA	12bp	TATTTAAGGAGGTGCTAGTATG
OGK40535.1|GCA_001789635.1|Candidatus_Roizmanbacteria_bacterium_RIFCSPLOWO2_01_FULL_35_13|CPR	ATG	TAA	4bp	GAGAGGAGGCATTAATTTTATG
OGK73690.1|GCA_001788355.1|Candidatus_Roizmanbacteria_bacterium_RIFOXYD1_FULL_38_12|CPR	ATG	TATTA	3bp	TTAAGGAGGTGTATTAATAATG
OGY07103.1|GCA_001816375.1|Candidatus_Blackburnbacteria_bacterium_RIFCSPHIGHO2_01_FULL_40_17|CPR	ATG	AAT	5bp	GAAAGGGGGCGAATTATGAATG
OGY08925.1|GCA_001816405.1|Candidatus_Blackburnbacteria_bacterium_RIFCSPHIGHO2_02_FULL_39_13|CPR	ATG	AAT	5bp	GAAAGGGGGCGAATTATGAATG
OGY11759.1|GCA_001816895.1|Candidatus_Blackburnbacteria_bacterium_RIFCSPHIGHO2_12_FULL_41_13b|CPR	ATG	ATA	5bp	TAAAGGAGGCGATACATGGATG
OGY11914.1|GCA_001816455.1|Candidatus_Blackburnbacteria_bacterium_RIFCSPHIGHO2_12_FULL_44_25|CPR	ATG	None	None	GGGTCGAATAATTACTTATATG
OGY16234.1|GCA_001816905.1|Candidatus_Chisholmbacteria_bacterium_RIFCSPHIGHO2_01_FULL_49_18|CPR	ATG	None	None	AGGTGTCTAAAGAAAACATATG
OGY18251.1|GCA_001816585.1|Candidatus_Chisholmbacteria_bacterium_RIFCSPHIGHO2_01_FULL_52_32|CPR	ATG	None	None	GGGTGTTTTTTCATCTCGTATG
OGY20376.1|GCA_001816955.1|Candidatus_Chisholmbacteria_bacterium_RIFCSPLOWO2_01_FULL_50_28|CPR	ATG	None	None	GGGTGTTTTTTCATCTCGTATG
OGY21794.1|GCA_001816915.1|Candidatus_Chisholmbacteria_bacterium_RIFCSPLOWO2_01_FULL_49_14|CPR	ATG	AGGA	5-10bp	CCGAAGAGAAGGATTTTAAATG
OGY21794.1|GCA_001816915.1|Candidatus_Chisholmbacteria_bacterium_RIFCSPLOWO2_01_FULL_49_14|CPR	ATG	None	None	AGGTGTCTAAAGAAAACATATG
OGY22109.1|GCA_001816635.1|Candidatus_Woykebacteria_bacterium_GWA1_44_8|CPR	ATG	None	None	GGGTGTTTCTTTTTATCATATG
OGY23177.1|GCA_001816655.1|Candidatus_Woykebacteria_bacterium_RBG_13_40_15|CPR	ATG	None	None	CTTTTTACTTTAATATTACATG
OGY26578.1|GCA_001816995.1|Candidatus_Woykebacteria_bacterium_RBG_19FT_COMBO_43_10|CPR	ATG	None	None	TTAACCGTCCGACCAAATAATG
OGY30180.1|GCA_001816985.1|Candidatus_Woykebacteria_bacterium_RIFCSPHIGHO2_12_FULL_45_10|CPR	ATG	None	None	GAGGTGTGTTTTTTCTTTTATG
OGY31861.1|GCA_001816835.1|Candidatus_Woykebacteria_bacterium_RIFCSPLOWO2_01_FULL_43_14|CPR	ATG	None	None	TGGGGGTGCAATTTAGCTTATG
OIP56913.1|GCA_001873195.1|Candidatus_Kuenenbacteria_bacterium_CG2_30_39_24|CPR	ATG	AGxAGG/AGGxGG	5-10bp	TTGAAAGGGGGTGTTAATTATG
PIP87728.1|GCA_002771645.1|Candidatus_Beckwithbacteria_bacterium_CG22_combo_CG10-13_8_21_14_all_01_47_9|CPR	GTG	None	None	TCAAAAACAATTAAGGGAGGTG
PIR49233.1|GCA_002772745.1|Candidatus_Peregrinibacteria_bacterium_CG10_big_fil_rev_8_21_14_0_10_55_24|CPR	ATG	None	None	CCCTAGCATCCCCCCGCTCATG
PIR58873.1|GCA_002772645.1|Candidatus_Pacebacteria_bacterium_CG10_big_fil_rev_8_21_14_0_10_56_10|CPR	ATG	None	None	TTAAGTCGATTTATTGGTTATG
PIS14581.1|GCA_002774065.1|Candidatus_Shapirobacteria_bacterium_CG09_land_8_20_14_0_10_39_12|CPR	ATG	TAA	6bp	GTGTGATTTTTAAATATTTATG
PIS32364.1|GCA_002774385.1|Candidatus_Peregrinibacteria_bacterium_CG08_land_8_20_14_0_20_41_10|CPR	ATG	None	None	ACTAGAAAGGAGATTTCACATG
PIV90928.1|GCA_002783265.1|Candidatus_Gracilibacteria_bacterium_CG17_big_fil_post_rev_8_21_14_2_50_48_13|CPR	ATG	None	None	CACGAAAGGAGGTGATGATATG
PIY71256.1|GCA_002785085.1|Candidatus_Roizmanbacteria_bacterium_CG_4_10_14_0_8_um_filter_35_28|CPR	ATG	None	None	GAGGAGGCGCAAATCATTTATG
PIY79053.1|GCA_002784585.1|Candidatus_Pacebacteria_bacterium_CG_4_10_14_0_8_um_filter_43_12|CPR	ATG	AGxAGG/AGGxGG	5-10bp	TTGAAAGGGGGTGTTAATTATG
PIY79642.1|GCA_002784585.1|Candidatus_Pacebacteria_bacterium_CG_4_10_14_0_8_um_filter_43_12|CPR	ATG	AGGAGG	5-10bp	GGGAAGGAGGTGAGAATAGATG
WP_039326918.1|GCF_000803625.1|Candidatus_Saccharibacteria_oral_taxon_TM7x|CPR	ATG	None	None	CTGTTATAATGTTTGCAGTATG

## Sheet: Spirochaetes_rbs_motif
accession	start codon	rbs_motif	rbs_spacer	rbs region
OHD42825.1|GCA_001830585.1|Spirochaetes_bacterium_GWD1_27_9|Spirochaetes	ATG	GGA/GAG/AGG	5-10bp	GAAGGGCAGGTGAGGAATAATG
OHD50352.1|GCA_001829335.1|Spirochaetes_bacterium_GWE2_31_10|Spirochaetes	TTG	AGxAGG/AGGxGG	5-10bp	AAAAAAGGTGGTGATTTACTTG
WP_002656880.1|GCF_000172295.2|Borrelia_burgdorferi_29805|Spirochaetes	TTG	AGGAGG	5-10bp	AATAAAAGGAGGTGATTTTTTG
WP_008724792.1|GCF_001013195.1|Brachyspira_hyodysenteriae|Spirochaetes	TTG	GGA/GAG/AGG	5-10bp	AAAAAGGCAGGTGAGTGAATTG
WP_010882203.1|GCF_001628695.1|Treponema_pallidum_subsp._pallidum|Spirochaetes	GTG	GGAGG	3-4bp	TTTTTTCAGGGGAGGGTCGGTG
WP_012422030.1|GCF_000568775.1|Borrelia_hermsii_YBT|Spirochaetes	TTG	AGGAGG	5-10bp	AAAATAAGGAGGTGATTTTTTG
WP_013607318.1|GCF_000190435.1|Sphaerochaeta_globosa_str._Buddy|Spirochaetes	ATG	AGxAGG/AGGxGG	11-12bp	GAAGGGGGGTGATTAATATATG
WP_028972448.1|GCF_000426705.1|Spirochaeta_cellobiosiphila_DSM_17781|Spirochaetes	GTG	None	None	GCACTAAACAATAAGGGAGGTG

## Sheet: Bacteroidetes_rbs_motif
accession	start codon	rbs_motif	rbs_spacer	rbs region
CP002545.1_2271|GCA_000190735.2|Bacteroidetes	ATG	TAA	3bp	GAAGGGTGGTATTTAACATATG
CP002825.1_1423|GCA_000211855.3|Bacteroidetes	ATG	None	None	ATACACATAATTTATAGATATG
CP003349.1_395|GCA_000242635.3|Bacteroidetes	TTG	TAA	7bp	TTAATAGATTAAAAATAGTTTG
WP_002558090.1|GCF_000614145.1|Bacteroides_faecichinchillae_JCM_17102|Bacteroidetes	ATG	TAAAAA	4bp	CATATTTAATAAAAACAAAATG
WP_002661178.1|GCF_000250635.1|Saprospira_grandis_str._Lewin|Bacteroidetes	ATG	AAA	8bp	TCAATTTTAAATACTATACATG
WP_004584912.1|GCF_002529345.1|Porphyromonas_gingivalis|Bacteroidetes	ATG	AAAAA	12bp	ATAAAAACAGAAGAAGATTATG
WP_005854174.1|GCF_000307435.1|Parabacteroides_distasonis_CL09T03C24|Bacteroidetes	ATG	TAA	11bp	CAATATAACAATTTAAATTATG
WP_007647901.1|GCF_000348685.1|Xanthomarina_gelatinilytica|Bacteroidetes	ATG	AATAA	9bp	TAGAAAATAAATATAACACATG
WP_008611447.1|GCF_000260115.1|Joostella_marina_DSM_19592|Bacteroidetes	ATG	TAAAA	7bp	TAAATATTAAAATCAACATATG
WP_008612104.1|GCF_000260115.1|Joostella_marina_DSM_19592|Bacteroidetes	ATG	TAA	10bp	TATAAATAATATACGCACTATG
WP_008623183.1|GCF_000233955.1|Paraprevotella_clara_YIT_11840|Bacteroidetes	ATG	TAAAAA	9bp	TTATTAAAAACAAAAAAACATG
WP_008989948.1|GCF_000300875.1|Galbibacter_marinus|Bacteroidetes	ATG	TAAA	8bp	TTTAATCTAAAATTGATCTATG
WP_008992143.1|GCF_000300875.1|Galbibacter_marinus|Bacteroidetes	ATG	TAA	15bp	TTAATTTCAAATATATAATATG
WP_009318008.1|GCF_000473955.1|Coprobacter_fastidiosus_NSB1|Bacteroidetes	ATG	TAA	11bp	TCTTTTAATTATAAAAAATATG
WP_009752364.1|GCF_000318095.2|Prevotella_sp._oral_taxon_473_str._F0040|Bacteroidetes	ATG	None	None	ATAATAATACACCACAACAATG
WP_010417777.1|GCF_000191885.1|Anaerophaga_thermohalophila_DSM_12881|Bacteroidetes	ATG	TAA	11bp	AATTTTAAAAGTTTAAATTATG
WP_010528825.1|GCF_000220155.1|Thermophagus_xiamenensis|Bacteroidetes	ATG	TAAA	12bp	ATTTAAAAATTTTAGAATTATG
WP_010663866.1|GCF_000259075.1|Marinilabilia_salmonicolor_JCM_21150|Bacteroidetes	ATG	TAA	11bp	AATATTAAAGACGAATATCATG
WP_012472357.1|GCF_000020565.1|Candidatus_Amoebophilus_asiaticus_5a2|Bacteroidetes	ATG	None	None	AAAACACATAGAACAAATTATG
WP_012789369.1|GCF_000024005.1|Chitinophaga_pinensis_DSM_2588|Bacteroidetes	ATG	AAAA	12bp	AAAAAAAAGGCTATTAATTATG
WP_012821626.1|GCF_000093165.1|Blattabacterium_sp._(Periplaneta_americana)_str._BPLAN|Bacteroidetes	ATG	None	None	TTTTTTTTACATTATTAGTATG
WP_013445223.1|GCF_000183135.1|Paludibacter_propionicigenes_WB4|Bacteroidetes	ATG	TAAA	12bp	CATTAAATAATTAATAGTTATG
WP_013764944.1|GCF_000212735.1|Haliscomenobacter_hydrossis_DSM_1100|Bacteroidetes	ATG	AAA	14bp	ATAAATATCATCATCCATTATG
WP_013870051.1|GCF_000211855.2|Lacinutrix_sp._5H-3-7-4|Bacteroidetes	ATG	None	None	ATACACATAATTTATAGATATG
WP_014225266.1|GCF_002529295.1|Tannerella_forsythia|Bacteroidetes	ATG	AATAA	6bp	AGCATTAAAATAAGAGTTTATG
WP_014373077.1|GCF_000250635.1|Saprospira_grandis_str._Lewin|Bacteroidetes	ATG	AAA	14bp	CTAAACCAAGGGGGTTTTTATG
WP_014934348.1|GCF_000304455.1|Cardinium_endosymbiont_cEper1_of_Encarsia_pergandiella|Bacteroidetes	ATG	ATAA	3bp	ATGACAAACTAAATAAAATATG
WP_015023026.1|GCF_000153485.2|Psychroflexus_torquis_ATCC_700755|Bacteroidetes	ATG	None	None	GTAAATAATTAATCATTATATG
WP_018339628.1|GCF_000379665.1|Butyricimonas_synergistica_DSM_23225|Bacteroidetes	ATG	TAAAAA	10bp	TTTTAAAAAAATAGAAATCATG
WP_018611416.1|GCF_000374045.1|Segetibacter_koreensis_DSM_18137|Bacteroidetes	TTG	TAAA	14bp	TTAAATTTTATTGAGTTTTTTG
WP_018626743.1|GCF_900101395.1|Niabella_drilacis|Bacteroidetes	ATG	TAAA	6bp	AAGGAGGTATAAATATTTTATG
WP_019149684.1|GCF_000312145.1|Alistipes_senegalensis_JC50|Bacteroidetes	ATG	AAAA	12bp	ACAAAAAACTAAGAATATTATG
WP_019207032.1|GCF_000312445.1|Phocaeicola_abscessus_CCUG_55929|Bacteroidetes	ATG	TAA	11bp	AAAATTAATTATTGAAAACATG
WP_019387676.1|GCF_000283015.1|Arenitalea_lutea|Bacteroidetes	ATG	AAA	8bp	CAAATATTAAATTCAAACTATG
WP_020530913.1|GCF_000379765.1|Flexithrix_dorotheae_DSM_6795|Bacteroidetes	ATG	TAA	15bp	ATAATTACAATTTTTATTTATG
WP_020931677.1|GCF_001447915.1|Candidatus_Sulcia_muelleri|Bacteroidetes	ATG	TAA	12bp	CATATAATGATAATTATTTATG
WP_021929538.1|GCF_001403595.1|Gabonia_massiliensis|Bacteroidetes	ATG	TAA	11bp	CTTTTTAATTATTAAAAATATG
WP_021987646.1|GCF_900091655.1|Culturomica_massiliensis|Bacteroidetes	ATG	TAA	12bp	ATATTAAAAATTGAATATCATG
WP_022063765.1|GCF_900104605.1|Tidjanibacter_massiliensis|Bacteroidetes	ATG	AAAAA	11bp	ACCAAAAATAGTTACGACAATG
WP_022101190.1|GCF_900106785.1|Prevotellamassilia_timonensis|Bacteroidetes	ATG	TAAAA	14bp	TAAAATCTAAACTCACAAAATG
WP_022160408.1|GCF_002161635.1|Odoribacter_splanchnicus|Bacteroidetes	ATG	TAA	12bp	ACTATAAAAATTAGAAATTATG
WP_025000424.1|GCF_000614025.1|Prevotella_aurantiaca_JCM_15754|Bacteroidetes	ATG	TAAAAA	9bp	TAAATAAAAACTAAAAAGCATG
WP_025279246.1|GCF_002161555.1|Barnesiella_sp._An55|Bacteroidetes	ATG	TAA	13bp	AACTAATCTCTAAATAATTATG
WP_025865186.1|GCF_000614865.1|Prolixibacter_bellariivorans_JCM_13498|Bacteroidetes	ATG	AATAA	9bp	TAAGTAATAAGGAAACGGTATG
WP_026348532.1|GCF_000382125.1|Eudoraea_adriatica_DSM_19308|Bacteroidetes	ATG	TAAA	12bp	AATTAAAGAAATAAAAAACATG
WP_026475037.1|GCF_000517065.1|Alkaliflexus_imshenetskii_DSM_15055|Bacteroidetes	ATG	TAA	11bp	AATATTAAAAACAAAAGTTATG
WP_026752269.1|GCF_000511175.1|Sediminibacterium_salmoneum_NBRC_103935|Bacteroidetes	ATG	TATAT	5bp	CTGAGGAGGTATATAAGCTATG
WP_026754628.1|GCF_000688335.1|Sediminibacter_sp._Hel_I_10|Bacteroidetes	ATG	TAA	14bp	TATAACCATTAGAAGTATCATG
WP_026773665.1|GCF_000427525.1|Asinibacterium_sp._OR43|Bacteroidetes	ATG	None	None	CCGAGGAGGTATCAACATTATG
WP_026773665.1|GCF_900106985.1|Hydrobacter_penzbergensis|Bacteroidetes	ATG	None	None	CCGAGGAGGTATCAACATTATG
WP_027290867.1|GCF_000427365.1|Rikenella_microfusus_DSM_15922|Bacteroidetes	ATG	AACAA	12bp	TTAACAAAGAAGATTCGTTATG
WP_027418931.1|GCF_000621625.1|Crocinitomix_catalasitica_ATCC_23190|Bacteroidetes	ATG	TAAAAA	6bp	TATATAATAAAAAAAAGATATG
WP_027472128.1|GCF_000517085.1|Saccharicrinis_fermentans_DSM_9555_=_JCM_21142|Bacteroidetes	ATG	TAAA	12bp	AAATAAAAAGGAAAAAATTATG
WP_027880486.1|GCF_000422365.1|Mesoflavibacter_zeaxanthinifaciens_DSM_18436|Bacteroidetes	ATG	AAAA	7bp	AAAGATTTAAAATACTGATATG
WP_027886010.1|GCF_000423405.1|Mesonia_mobilis_DSM_19841|Bacteroidetes	ATG	AAA	9bp	ATCATTTAAATGCGTATTAATG
WP_028283445.1|GCF_000518485.1|Olleya_marilimosa_CAM030|Bacteroidetes	ATG	TAAAA	7bp	CCAGATTTAAAATTTAGATATG
WP_028786878.1|GCF_000425585.1|Terrimonas_ferruginea_DSM_30193|Bacteroidetes	ATG	None	None	CCGAAGGAGGTATATAATTATG
WP_028873183.1|GCF_900104785.1|Formosa_sp._Hel1_31_208|Bacteroidetes	ATG	TAA	14bp	TATAACCACAAGTATTACAATG
WP_033957818.1|GCF_000797465.1|Psychroserpens_jangbogonensis|Bacteroidetes	ATG	TAAA	8bp	TAAACAATAAACCAAGTAAATG
WP_034042951.1|GCF_000789235.1|Flaviramulus_ichthyoenteri_Th78|Bacteroidetes	ATG	AAAAAA	5bp	AAACAATTAAAAAAATTATATG
WP_036381952.1|GCF_000745185.1|Muricauda_sp._MAR_2010_75|Bacteroidetes	ATG	TAA	11bp	AGTACTAAAAAGAAAATATATG
WP_036382048.1|GCF_000745185.1|Muricauda_sp._MAR_2010_75|Bacteroidetes	ATG	TAAAA	6bp	TGAACCGATAAAACAATATATG
WP_038266506.1|GCF_000511935.2|Zhouia_amylolytica_AD3|Bacteroidetes	ATG	TAA	11bp	ACCTTTAAAATTCTTATATATG
WP_038267045.1|GCF_000511935.2|Zhouia_amylolytica_AD3|Bacteroidetes	ATG	AAAAAA	5bp	GTATAATTAAAAAAAAGATATG
WP_038436150.1|GCF_000709555.1|Candidatus_Walczuchella_monophlebidarum|Bacteroidetes	ATG	AAAAT	7bp	AAATTAAAAAATCTAAAAGATG
WP_038556031.1|GCF_000626635.1|Draconibacterium_orientale|Bacteroidetes	ATG	TAAA	10bp	AAATGTAAATCCGAAAGATATG
WP_038653681.1|GCF_000723505.1|Mucinivorans_hirudinis|Bacteroidetes	ATG	AAAAAA	8bp	GAATTAAAAAATTAAAACTATG
WP_039137754.1|GCF_000814475.1|Flavihumibacter_solisilvae|Bacteroidetes	ATG	None	None	CCAAAGGAGGTATATTACCATG
WP_041504187.1|GCF_000832075.1|Sanguibacteroides_justesenii|Bacteroidetes	ATG	TAA	12bp	TTTTTAAAAATAAAAGATCATG
WP_041504187.1|GCF_000832075.1|Sanguibacteroides_justesenii|Bacteroidetes	ATG	TAAA	11bp	TTTTTAAAAATAAAAGATCATG
WP_041504187.1|GCF_001487125.1|Gabonibacter_massiliensis|Bacteroidetes	ATG	TAA	12bp	TTTTTAAAAATAAAAGATCATG
WP_041504187.1|GCF_001487125.1|Gabonibacter_massiliensis|Bacteroidetes	ATG	TAAA	11bp	TTTTTAAAAATAAAAGATCATG
WP_042241608.1|GCF_000775755.1|Jejuia_pallidilutea|Bacteroidetes	ATG	AAAA	7bp	AATAACTTAAAATATATATATG
WP_044228369.1|GCF_000759025.1|Phaeodactylibacter_xiamenensis|Bacteroidetes	ATG	AAAA	8bp	TGAATAGAAAATCGAATCTATG
WP_044632863.1|GCF_000943565.1|Tamlana_sedimentorum|Bacteroidetes	ATG	AAAA	7bp	TAATAATTAAAACAACTATATG
WP_044637907.1|GCF_000941055.1|Siansivirga_zeaxanthinifaciens_CC-SAMT-1|Bacteroidetes	ATG	AAA	8bp	AATTATATAAATTTCATACATG
WP_045090196.1|GCF_000953535.1|Fermentimonas_caenicola|Bacteroidetes	ATG	AAA	11bp	CTAACAAATTTCAAATAAAATG
WP_045090196.1|GCF_001282625.1|Lascolabacillus_massiliensis|Bacteroidetes	ATG	AAA	11bp	CTAACAAATTTCAAATAAAATG
WP_050702598.1|GCF_001261735.1|Dysgonomonas_sp._BGC7|Bacteroidetes	ATG	TAAAA	12bp	AATAAAATAAAAGTCAATTATG
WP_052597807.1|GCF_000724545.1|Aureispira_sp._CCB-QB1|Bacteroidetes	ATG	TAAAAA	6bp	AAAACATTAAAAATATCACATG
WP_053185775.1|GCF_001270965.1|Sunxiuqinia_dokdonensis|Bacteroidetes	ATG	TAAAAA	9bp	CAGTTAAAAATATAATTATATG
WP_053969841.1|GCF_001280515.1|Mangrovimonas_sp._ST2L15|Bacteroidetes	ATG	TAAAA	7bp	AAACAATTAAAATCTATACATG
WP_054281658.1|GCF_001302245.1|Chitinophagaceae_bacterium_PMP191F|Bacteroidetes	ATG	TAAA	14bp	TTAAAGGAGGTATCAAACTATG
WP_054716146.1|GCF_001310955.1|Marinifilum_fragile_JCM_15579|Bacteroidetes	ATG	TAA	11bp	AATATTAAAGGAGAAAATTATG
WP_054729126.1|GCF_001310225.1|Algibacter_alginicilyticus|Bacteroidetes	ATG	TAAAAA	6bp	TATAAATTAAAAATCACATATG
WP_057952293.1|GCF_001443605.1|Salinivirga_cyanobacteriivorans|Bacteroidetes	ATG	TAAA	11bp	AAATTAAATAGATAATATTATG
WP_062040043.1|GCF_001192835.1|Lentimicrobium_saccharophilum|Bacteroidetes	ATG	AAA	14bp	AGAAAGAGAGCGTATTCGCATG
WP_062123987.1|GCF_000974365.1|Geofilum_rubicundum_JCM_15548|Bacteroidetes	ATG	TAA	11bp	AAATTTAAACAGAAGAATTATG
WP_066407882.1|GCF_001644645.1|Flavisolibacter_tropicus|Bacteroidetes	ATG	TAAA	13bp	TTTAAAGGAGGTATAACGCATG
WP_066433236.1|GCF_001678675.1|Gelidibacter_algens|Bacteroidetes	ATG	TAA	9bp	TATACTCTAATAATTATCTATG
WP_068185053.1|GCF_001704385.2|Macellibacteroides_sp._HH-ZS|Bacteroidetes	ATG	TAA	11bp	TATTATAATAAATTAAATTATG
WP_068959768.1|GCF_002201515.1|Muribaculum_intestinale|Bacteroidetes	ATG	AATAA	6bp	ATAAAATCAATAACTAAACATG
WP_071134792.1|GCF_900104655.1|Millionella_massiliensis|Bacteroidetes	ATG	AAAA	11bp	CACTAAAAAAAGAACTACCATG
WP_071137548.1|GCF_900095795.1|Petrimonas_mucosa|Bacteroidetes	ATG	AAAAAA	7bp	AATCTCAAAAAATAAAAATATG
WP_072348474.1|GCF_001887885.1|Flavobacteriaceae_bacterium_A100|Bacteroidetes	ATG	TAAA	8bp	CCACAATTAAAGAATCATTATG
WP_073002646.1|GCF_900129025.1|Mariniphaga_anaerophila|Bacteroidetes	ATG	TAAAA	12bp	TTTAAAATACGGTATCAAAATG
WP_073042201.1|GCF_001953305.1|Cnuella_takakiae|Bacteroidetes	ATG	AAA	15bp	TAAAGGAGGTATATAAAGCATG
WP_073166136.1|GCF_900141875.1|Tangfeifania_diversioriginum|Bacteroidetes	ATG	AAAAA	12bp	TAAAAAAAGGAGTAGAAAAATG
WP_075340803.1|GCF_001936575.1|Tenacibaculum_agarivorans|Bacteroidetes	ATG	AACAA	9bp	ATTAAAACAATAATTATATATG
WP_075602219.1|GCF_001660705.2|Labilibacter_aurantiacus|Bacteroidetes	ATG	AAA	10bp	AAAATCAAAGGAGATAGTTATG
WP_076381969.1|GCF_002355595.1|Filimonas_lacunae|Bacteroidetes	ATG	None	None	ACAAAAGGAGGTATCCACAATG
WP_076699353.1|GCF_001971785.1|Seonamhaeicola_sp._S2-3|Bacteroidetes	ATG	AAAAAA	6bp	TTAACTCAAAAAACTCCATATG
WP_076931504.1|GCF_900095135.1|Proteiniphilum_saccharofermentans|Bacteroidetes	ATG	TAAA	12bp	AATTAAACAAACAACAAATATG
WP_079556524.1|GCF_900168165.1|Alkalitalea_saponilacus|Bacteroidetes	ATG	TAAAAA	9bp	AAATTAAAAACAAATTGCTATG
WP_079592973.1|GCF_900167895.1|Bacteroidales_bacterium_WCE2004|Bacteroidetes	ATG	None	None	AAAAGGAGGTGTAAAAGCAATG
WP_080318565.1|GCF_002072105.2|Croceivirga_radicis|Bacteroidetes	ATG	TAAAA	9bp	GCGATTAAAACAATAAAAAATG
WP_081197547.1|GCF_002077935.1|Niastella_yeongjuensis|Bacteroidetes	ATG	TAAA	15bp	TAAAGGAGGTATATAATATATG
WP_085536913.1|GCF_900178525.1|Massilibacteroides_vaginae|Bacteroidetes	ATG	TAAA	6bp	ATAAAATAATAAATTAATTATG
WP_087338118.1|GCF_002160055.1|Mediterranea_sp._An20|Bacteroidetes	ATG	TAA	10bp	AAATTTTAAAACCAAAAAAATG
WP_087563006.1|GCF_002163835.1|Polaribacter_sp._SA4-10|Bacteroidetes	ATG	AATAA	11bp	TTAAATAAATAAAAGAATAATG
WP_090654078.1|GCF_900115755.1|Parafilimonas_terrae|Bacteroidetes	ATG	AAAAAA	13bp	AAAAAAGGAAAAGTAATTTATG
WP_091397539.1|GCF_900107765.1|Arachidicoccus_rhizosphaerae|Bacteroidetes	ATG	None	None	AAAGGGGGTATATAAAATTATG
WP_092434155.1|GCF_900096565.1|Williamwhitmania_taraxaci|Bacteroidetes	ATG	TAAA	11bp	CAATTAAACAAGTATCGCCATG
WP_092446595.1|GCF_900105425.1|Winogradskyella_sp._RHA_55|Bacteroidetes	ATG	AAAAA	12bp	ACAAAAATATATCGATATAATG
WP_092459774.1|GCF_900116565.1|Crenotalea_thermophila|Bacteroidetes	ATG	AATAA	10bp	AAAAAATAAAGGAGACCTTATG
WP_092574029.1|GCF_900111025.1|Hyunsoonleella_jejuensis|Bacteroidetes	ATG	AAA	15bp	CAAAAATACTATTATATTTATG
WP_093025959.1|GCF_900116665.1|Pustulibacterium_marinum|Bacteroidetes	ATG	None	None	AAACTATAGGAGGATTTATATG
WP_099105555.1|GCF_002631205.1|Lewinella_marina|Bacteroidetes	ATG	None	None	CAAAAAATAGGAACGCTTAATG
WP_099563377.1|GCF_002741945.1|Gaetbulibacter_sp._4G1|Bacteroidetes	ATG	TAAA	8bp	AATAAAATAAATTATATTTATG
